# Supplementary material for: A Cross-Tissue Transcriptome-Wide Association Study Identifies Novel Susceptibility Genes for Juvenile Idiopathic Arthritis in Asia and Europe
Source: Front Immunol. 2022 Jul 28;13:941398. doi: 10.3389/fimmu.2022.941398 (PMC9367689; doi:10.3389/fimmu.2022.941398)
Supplement: Supplementary file 2 [file Table_1.xlsx]

## Sheet: Supplmental Table1
Supplementary Table 1: Candidate genes identified by transcriptome-wide association study (TWAS) analysis (Asian population).
TISSUE	ID	CHR	BEST.GWAS.ID	NSNP	TWAS.Z	TWAS.P
WB	PSRC1	1	rs4970834	430	-3.164	0.00156
WB	RP11-46A10.4	1	rs10429833	451	3.005	0.00266
WB	LAMC1	1	rs1360704	496	2.73	0.00633
WB	LRRC8B	1	rs12136622	376	-2.663	0.00774
WB	VANGL1	1	rs1767259	549	2.6057	0.00917
WB	B3GALT6	1	rs35424002	220	-2.216	0.02669
WB	GNL2	1	rs28545785	452	2.16431	0.03044
WB	TBCE	1	rs6665064	360	2.13855	0.03247
WB	FHL3	1	rs6678251	459	-2.1162	0.03433
WB	PADI2	1	rs10788668	369	2.036	0.04175
WB	FAAH	1	rs12759113	349	1.96825	0.04904
SM	CELSR2	1	rs4970834	423	-3.3446	0.000824
SM	MAP3K6	1	rs4970520	230	-2.901	0.00372
SM	GNG12	1	rs10789244	574	2.805	0.005032
SM	RP11-181K3.4	1	rs1360704	445	2.729	0.006353
SM	TARS2	1	rs2147324	280	-2.68799	0.007188
SM	RPRD2	1	rs17581380	266	-2.49215	0.012697
SM	IL12RB2	1	rs2803460	498	2.47082	0.01348
SM	SDC3	1	rs544789	506	-2.447	0.014405
SM	MAN1A2	1	rs12726592	485	2.40814	0.016034
SM	RP11-504P24.2	1	rs6693884	296	2.35333	0.018606
SM	MRPS21	1	rs17581380	250	2.34623	0.018964
SM	SCCPDH	1	rs10924812	441	-2.27135	0.023126
SM	VANGL1	1	rs1767259	531	2.262	0.023697
SM	FLVCR1-AS1	1	rs792447	414	2.25679	0.024021
SM	TP53BP2	1	rs6693884	363	-2.25	0.024449
SM	LRRC8B	1	rs12136622	350	-2.213	0.026898
SM	SDCCAG8	1	rs12116614	284	-2.18498	0.028891
SM	KIAA0754	1	rs12028034	371	-2.17896	0.029335
SM	B4GALT2	1	rs17416416	412	-2.17578	0.029572
SM	PSRC1	1	rs4970834	442	-2.14866	0.031662
SM	CEP104	1	rs6669278	454	2.12637	0.033473
SM	DPT	1	rs11580561	583	-2.12237	0.033807
SM	THEM4	1	rs7536659	336	-2.115	0.03443
SM	FMO3	1	rs12724905	531	2.103	0.035466
SM	PBX1	1	rs17383948	538	2.094	0.03626
SM	PPIE	1	rs12028034	389	-2.03084	0.042272
SM	ST3GAL3	1	rs11541153	422	2.01231	0.044187
SM	IFNLR1	1	rs9424374	403	-2.01132	0.044291
SM	GGPS1	1	rs6665064	346	1.98339	0.047324
SM	RP11-31F15.2	1	rs1216870	337	-1.98161	0.047522
SM	RP11-17E13.2	1	rs6662846	377	1.97361	0.048426
SM	TCEA3	1	rs4649104	314	-1.96678	0.049208
WB	STK17B	2	rs3736516	376	-3.5904	0.00033
WB	RP11-459I19.1	2	rs34745867	364	2.3811	0.01726
WB	NABP1	2	rs12472343	395	-2.1821	0.0291
WB	PLCL1	2	rs10186715	517	2.0915	0.03648
WB	AC016747.3	2	rs11680679	301	-2.0791	0.03761
WB	ATIC	2	rs11695198	473	-1.9948	0.04607
SM	STK17B	2	rs3736516	371	-2.96268	0.00305
SM	COX7A2L	2	rs6738967	486	2.61315	0.00897
SM	FAM179A	2	rs12619829	596	-2.532	0.01134
SM	AC007405.2	2	rs2011087	468	-2.457	0.01401
SM	UXS1	2	rs1477514	438	2.41563	0.01571
SM	ANAPC1	2	rs3814026	309	-2.415	0.01574
SM	FTOP1	2	rs6738967	453	2.39814	0.01648
SM	CPS1	2	rs1551610	346	-2.373	0.01764
SM	EML4	2	rs6738967	522	-2.364	0.01808
SM	CYBRD1	2	rs17221848	357	2.30449	0.0212
SM	PPM1B	2	rs7593987	501	-2.25443	0.02417
SM	LY75	2	rs12467263	445	-2.208	0.02724
SM	ILKAP	2	rs11891894	487	2.173	0.02978
SM	ACVR1C	2	rs13023441	349	2.11803	0.03417
SM	PPP1R7	2	rs3275	423	2.107	0.03512
SM	RP11-342K6.1	2	rs11888390	535	-2.102	0.03555
SM	SCN9A	2	rs497480	431	2.06975	0.03848
WB	UBA7	3	rs2298953	322	-2.039	0.0415
WB	SUCLG2	3	rs12496418	519	-2.0375	0.0416
SM	AC090945.1	3	rs2455833	474	-3.571	0.000356
SM	TDGF1	3	rs3806702	374	-3.49143	0.00048
SM	COLQ	3	rs2455833	383	-3.30522	0.000949
SM	METTL6	3	rs2455833	377	-3.05774	0.00223
SM	MAATS1	3	rs7644234	513	-2.96794	0.002998
SM	EAF1-AS1	3	rs2455833	377	-2.966	0.003017
SM	WDR53	3	rs9843585	409	-2.6742	0.007491
SM	RNF168	3	rs9843585	409	-2.66824	0.007625
SM	GADL1	3	rs12054099	504	-2.567	0.010258
SM	LUZPP1	3	rs3806702	381	2.565	0.010318
SM	WDR5B	3	rs11716890	463	-2.52949	0.011423
SM	LRRC58	3	rs16831660	382	2.52358	0.011617
SM	LRRC3B	3	rs7623573	412	-2.444	0.014525
SM	AC114877.3	3	rs1522135	411	-2.444	0.014525
SM	APPL1	3	rs12635549	398	2.27135	0.023126
SM	KRT18P17	3	rs165435	539	-2.25883	0.023894
SM	RAB43	3	rs7632015	317	-2.22842	0.025852
SM	RABL3	3	rs16831660	345	2.22061	0.026377
SM	NGLY1	3	rs6788600	449	2.21425	0.026811
SM	MST1	3	rs4541435	316	2.21391	0.026835
SM	POPDC2	3	rs7644234	517	2.20904	0.027172
SM	RFT1	3	rs1560333	370	-2.186	0.028816
SM	SUSD5	3	rs1599770	357	-2.185	0.028889
SM	CAND2	3	rs165435	540	-2.17716	0.029469
SM	GBE1	3	rs2172397	301	-2.16345	0.030506
SM	THOC7	3	rs9837015	605	-2.09807	0.035899
SM	TMA7	3	rs12491849	258	2.087	0.036888
SM	TREX1	3	rs12491849	257	-2.0584	0.039552
SM	ATP13A5-AS1	3	rs1879978	414	-2.027	0.042662
SM	KLHL18	3	rs6442037	159	2.01073	0.044354
SM	CCDC58	3	rs11716890	474	1.99631	0.0459
WB	HTRA3	4	rs4696925	564	-2.785	0.00535
WB	AGA	4	rs6830655	435	-2.46004	0.01389
SM	NDNF	4	rs13128284	472	4.396	1.1e-05
SM	THAP9-AS1	4	rs982146	469	2.56552	0.010302
SM	DCTD	4	rs11132145	505	2.31594	0.020562
SM	SH3D19	4	rs12509302	279	2.26076	0.023774
SM	ADAMTS3	4	rs1318824	321	2.24663	0.024663
SM	PRDM8	4	rs9996519	366	-2.24	0.025091
SM	SEPT11	4	rs716024	569	2.022	0.043176
SM	GALNTL6	4	rs836020	308	2.01923	0.043463
SM	BTC	4	rs1494880	370	-1.999	0.045608
WB	PCYOX1L	5	rs1833661	568	-3.3346	0.000854
WB	DAP	5	rs2907099	672	2.92732	0.003419
WB	IQGAP2	5	rs9293685	720	-2.425	0.015308
SM	C5orf22	5	rs584128	675	3.67154	0.000241
SM	C6	5	rs454232	469	-2.45774	0.013981
SM	TMEM161B-AS1	5	rs16903122	274	2.398	0.016485
SM	BTNL8	5	rs1382302	331	2.37736	0.017437
SM	2022-03-03	5	rs4131248	368	-2.29197	0.021907
SM	BTNL9	5	rs1382302	284	-2.258	0.023946
SM	FBXL17	5	rs17161236	380	-2.25677	0.024022
SM	RP11-1277A3.2	5	rs34582406	242	-2.20378	0.02754
SM	DAP	5	rs2907099	630	2.17533	0.029605
SM	MFAP3	5	rs11748836	550	-2.09068	0.036557
SM	GUSBP3	5	rs13362324	99	2.09013	0.036606
SM	CENPH	5	rs13436110	304	-2.043	0.041052
SM	KDM3B	5	rs7734236	297	-2.03819	0.041531
SM	ADAMTS19-AS1	5	rs3853126	397	2.03066	0.042289
SM	OXCT1	5	rs6881873	294	2.0238	0.04299
SM	RP11-54F2.1	5	rs2907099	614	2.01206	0.044214
WB	CCDC28A	6	rs9376375	426	-2.0261	0.0428
SM	XXbac-BPG299F13.17	6	rs9263733	176	-2.6533	0.00797
SM	CDC40	6	rs1103996	454	2.6033	0.00923
SM	CCDC167	6	rs1541227	497	2.594	0.00949
SM	AK9	6	rs9400317	440	2.4995	0.01244
SM	RP11-302L19.3	6	rs3823465	437	2.3551	0.01852
SM	TPBG	6	rs770895	374	2.2552	0.02412
SM	SHPRH	6	rs362936	266	2.2514	0.02436
SM	PRIM2	6	rs4506048	204	2.2511	0.02438
SM	PEX7	6	rs2295592	400	2.2166	0.02665
SM	CLVS2	6	rs4962257	426	-2.1831	0.02903
SM	RP11-545I5.3	6	rs734166	265	2.065	0.03892
SM	LEMD2	6	rs2499726	540	1.9787	0.04785
SM	NUP153	6	rs4142551	378	-1.968	0.04907
WB	AC002467.7	7	rs2395911	428	2.63951	0.0083
WB	RASA4CP	7	rs10951757	334	2.089	0.0367
WB	LINC00957	7	rs10951757	329	2.06113	0.0393
WB	SCRN1	7	rs10276961	493	-2.017	0.0437
SM	CUL1	7	rs17434745	464	-2.91237	0.00359
SM	RP11-634H22.1	7	rs17160621	360	-2.53065	0.01138
SM	AC002467.7	7	rs2395911	436	2.462	0.01382
SM	C7orf41	7	rs2709778	393	-2.21982	0.02643
SM	SLC37A3	7	rs5763	437	-2.1378	0.03253
SM	ACTR3C	7	rs17134452	348	-2.11165	0.03472
SM	SCRN1	7	rs10276961	430	2.107	0.03512
SM	LINC00957	7	rs10951757	348	2.091	0.03653
SM	KDELR2	7	rs11769573	306	2.078	0.03771
WB	SNX16	8	rs1597753	333	-2.0695	0.0385
WB	RP13-582O9.5	8	rs6990605	359	1.964	0.0495
SM	RP11-760H22.2	8	rs7814292	440	2.16259	0.0306
SM	MAK16	8	rs4733163	255	-2.07112	0.0383
SM	ZFP41	8	rs6990605	389	-2.058	0.0396
SM	GSDMC	8	rs10113684	463	1.99562	0.046
SM	RP11-578O24.2	8	rs7011634	322	1.98946	0.0467
SM	RP13-582O9.5	8	rs6990605	384	1.96069	0.0499
WB	PSMD5-AS1	9	rs1837	370	2.2031	0.0276
WB	RGS3	9	rs479766	644	2.0781	0.0377
WB	ARRDC1	9	rs7023287	338	-1.9998	0.0455
WB	PNPLA7	9	rs10118305	366	-1.9635	0.0496
SM	TMEM38B	9	rs2997726	394	-2.94045	0.00328
SM	DMRT2	9	rs647257	864	-2.49516	0.01259
SM	RP11-188C12.2	9	rs7023287	298	-2.35046	0.01875
SM	ERCC6L2	9	rs2257157	531	2.21756	0.02658
SM	RP11-535M15.2	9	rs2257157	257	-2.10869	0.03497
SM	NSMF	9	rs7023287	346	-2.094	0.03626
SM	PSMD5-AS1	9	rs1837	359	2.09176	0.03646
SM	AGTPBP1	9	rs1250792	356	2.08532	0.03704
SM	ZMYND19	9	rs7023287	345	-2.076	0.03789
SM	C9orf72	9	rs10968150	722	-1.995	0.04604
WB	RSU1	10	rs17320049	728	2.402	0.0163
WB	FRAT2	10	rs12268044	463	-2.194	0.0282
SM	PCBD1	10	rs7093309	685	2.92137	0.00348
SM	AGAP9	10	rs7899683	195	2.536	0.01121
SM	BICC1	10	rs7080572	402	2.52486	0.01157
SM	ASAH2B	10	rs4935738	465	-2.24913	0.0245
SM	RSU1	10	rs17320049	652	2.21446	0.0268
SM	PLXDC2	10	rs7076737	587	2.16638	0.03028
SM	ENTPD1-AS1	10	rs12764493	478	2.14342	0.03208
SM	PTER	10	rs17320049	551	-2.10077	0.03566
SM	AGAP7	10	rs2579034	70	2.07462	0.03802
SM	BEND7	10	rs17533373	685	2.019	0.04349
SM	MCM10	10	rs11258057	653	2.017	0.0437
SM	ZNF503-AS1	10	rs4746284	340	2.01506	0.0439
WB	RP11-326C3.11	11	rs9704354	311	2.776	0.0055
WB	MED19	11	rs503037	375	-2.123	0.0338
WB	C1QTNF4	11	rs10838698	277	2.038	0.0415
WB	DOC2GP	11	rs947895	241	-2.016	0.0438
WB	MEN1	11	rs1195962	321	2.012	0.0442
SM	SNHG1	11	rs489381	321	-3.17252	0.00151
SM	TMEM223	11	rs489381	335	-2.75461	0.00588
SM	SLC39A13	11	rs10838698	288	-2.54623	0.01089
SM	NUDT8	11	rs11227879	261	-2.526	0.01154
SM	VPS37C	11	rs17156014	370	-2.509	0.01211
SM	SIGIRR	11	rs3809112	373	2.47277	0.01341
SM	MED19	11	rs503037	385	-2.33534	0.01953
SM	RP11-867G23.8	11	rs4930368	307	-2.329	0.01986
SM	RP11-110I1.11	11	rs12417523	382	-2.16243	0.03058
SM	CCDC82	11	rs11549808	474	-2.117	0.03426
SM	C1QTNF4	11	rs10838698	285	2.06661	0.03877
SM	SNX15	11	rs1195962	335	-2.05	0.04036
SM	RP11-326C3.11	11	rs3809112	328	2.03117	0.04224
SM	GSTP1	11	rs11227879	259	2.023	0.04307
SM	CD5	11	rs17156014	377	-2.02282	0.04309
SM	IFT46	11	rs2155854	442	1.96382	0.04955
SM	PDE2A	11	rs7110801	313	1.963	0.04965
WB	RP11-302B13.1	12	rs2731094	328	2.623	0.00872
WB	RP11-302B13.5	12	rs2731094	328	2.623	0.00872
WB	NINJ2	12	rs2286007	475	-2.27458	0.02293
WB	TAPBPL	12	rs1043262	403	2.10559	0.03524
WB	TMTC1	12	rs7301390	760	-1.97791	0.04794
SM	TAPBPL	12	rs1043262	423	3.041	0.00236
SM	RP11-153M3.1	12	rs813497	305	-2.96336	0.00304
SM	DKFZP779L1853	12	rs2731094	517	2.76374	0.00571
SM	CLEC2B	12	rs526680	302	2.603	0.00924
SM	CCDC65	12	rs2731094	338	-2.58	0.00988
SM	HOXC-AS1	12	rs11170881	412	-2.55298	0.01068
SM	GCN1L1	12	rs16950051	376	-2.47397	0.01336
SM	GOLGA2B	12	rs11110373	342	-2.436	0.01485
SM	EP400NL	12	rs4964933	320	-2.39756	0.0165
SM	LETMD1	12	rs17124888	391	-2.30533	0.02115
SM	CTD-2021H9.3	12	rs1798096	499	2.275	0.02291
SM	GATC	12	rs16950051	392	-2.23522	0.0254
SM	CD4	12	rs1043262	254	2.19985	0.02782
SM	NAV3	12	rs11105827	565	2.18576	0.02883
SM	LTBR	12	rs1043262	464	2.07393	0.03809
SM	CLEC12A	12	rs526680	338	-2.053	0.04007
SM	IFNG-AS1	12	rs10748093	609	2.0362	0.04173
SM	LRRC43	12	rs2068223	332	1.97216	0.04859
WB	CDC16	13	rs3993426	200	-3.1344	0.00172
WB	TUBGCP3	13	rs9549463	538	2.1026	0.0355
SM	CDC16	13	rs3993426	207	-3.12611	0.00177
SM	ANKRD10	13	rs885339	644	-2.584	0.00977
SM	RNF6	13	rs12585793	515	-2.263	0.02364
SM	TUBGCP3	13	rs9549463	521	2.01701	0.04369
WB	PPP2R3C	14	rs17103235	372	-2.96866	0.00299
WB	SETD3	14	rs12879129	581	-2.07543	0.03795
SM	MED6	14	rs17176306	437	-2.8943	0.0038
SM	COX16	14	rs17176306	568	2.795	0.00519
SM	RP11-7F17.3	14	rs2174333	553	2.554	0.01065
SM	PPP2R3C	14	rs17103235	368	2.456	0.01405
SM	COQ6	14	rs10141786	411	-2.1397	0.03238
SM	LIN52	14	rs10141786	420	-2.136	0.03268
SM	FAM177A1	14	rs17103235	373	2.1026	0.0355
SM	CHURC1	14	rs12435626	493	2.0341	0.04194
SM	SYNE2	14	rs4902254	363	-2.0119	0.04423
SM	CTD-2540L5.6	14	rs17176306	434	-2.01	0.04443
SM	GALNT16	14	rs12050204	455	1.9913	0.04644
WB	ANKDD1A	15	rs1628955	307	2.783	0.00539
WB	LYSMD4	15	rs7497935	499	2.3938	0.01667
WB	RP11-139H15.1	15	rs7182121	436	-2.263	0.02364
WB	C15orf40	15	rs1989	315	2.2268	0.02596
WB	ST20	15	rs16971253	571	2.1874	0.02871
WB	CTD-2008A1.2	15	rs2290331	292	-1.963	0.04965
SM	AGBL1	15	rs4842907	623	2.7702	0.0056
SM	TRIM69	15	rs2290331	250	2.637	0.00836
SM	SORD	15	rs2290331	308	-2.46	0.01389
SM	RAB27A	15	rs17238269	447	2.0731	0.03816
SM	LYSMD4	15	rs7497935	506	2.0234	0.04304
SM	CTD-3092A11.1	15	rs12101510	133	-2.021	0.04328
WB	COG4	16	rs2305689	157	-2.289	0.0221
WB	EXOSC6	16	rs2305688	194	-2.283	0.0224
WB	ZFP90	16	rs8045344	313	2.25273	0.0243
WB	ITGAM	16	rs3764326	275	-2.069	0.0385
WB	ITGAX	16	rs3764326	272	1.97838	0.0479
SM	KIFC3	16	rs1582594	549	-3.084	0.00204
SM	ERI2	16	rs234288	338	3.03549	0.0024
SM	RFWD3	16	rs10871290	353	-2.91	0.00361
SM	COG4	16	rs2305689	159	2.68044	0.00735
SM	RP11-252A24.2	16	rs10871290	362	2.626	0.00864
SM	RP11-252A24.3	16	rs10871290	361	2.626	0.00864
SM	URAHP	16	rs12920868	259	2.4743	0.01335
SM	MGRN1	16	rs703812	422	2.39561	0.01659
SM	ATF7IP2	16	rs11648669	611	2.288	0.02214
SM	ACSM3	16	rs234288	397	2.27671	0.0228
SM	QPRT	16	rs17835978	185	-2.204	0.02752
SM	RP11-296I10.6	16	rs2305688	200	-2.20046	0.02777
SM	RP11-388M20.6	16	rs13332545	250	2.18006	0.02925
SM	AARS	16	rs2305689	204	-2.155	0.03116
SM	NPIPP1	16	rs10221046	102	-2.04811	0.04055
SM	ABCC1	16	rs4781712	438	-1.99	0.04659
SM	EXOSC6	16	rs2305688	202	-1.97354	0.04843
SM	SEC14L5	16	rs4786640	406	1.96009	0.04999
WB	RP11-849F2.8	17	rs7223859	431	2.726	0.00641
WB	CTC1	17	rs7223859	443	2.70489	0.00683
WB	RP11-47L3.1	17	rs1383541	355	2.4397	0.0147
WB	KSR1	17	rs883127	338	-2.28117	0.02254
WB	KIAA0753	17	rs9901525	594	-2.061	0.0393
SM	POLDIP2	17	rs7220772	271	-2.723	0.00647
SM	ACTG1	17	rs9910792	313	2.67425	0.00749
SM	BZRAP1	17	rs2680688	348	2.62284	0.00872
SM	MILR1	17	rs17688272	226	-2.30722	0.02104
SM	TRPV3	17	rs9135	522	-2.29484	0.02174
SM	CAMTA2	17	rs1806262	426	2.27096	0.02315
SM	SERPINF1	17	rs4790825	437	-2.26346	0.02361
SM	SCPEP1	17	rs4793852	502	-2.25773	0.02396
SM	RP11-680C21.1	17	rs9913953	573	-2.24597	0.02471
SM	C17orf104	17	rs936018	405	2.203	0.02759
SM	FBF1	17	rs4561495	403	-2.188	0.02867
SM	RP5-1050D4.5	17	rs1806262	426	-2.16361	0.03049
SM	SUPT4H1	17	rs2680688	346	-2.14	0.03235
SM	CCDC40	17	rs11657716	405	2.10907	0.03494
SM	SGSM2	17	rs4790825	416	2.06438	0.03898
SM	LRRC48	17	rs34673242	386	2.05639	0.03974
SM	TRIM65	17	rs4561495	391	-2.049	0.04046
SM	TSEN54	17	rs4561495	346	-2.04705	0.04065
SM	CNTNAP1	17	rs659497	268	1.999	0.04561
SM	RAC3	17	rs11871837	321	1.98565	0.04707
SM	RP11-742D12.2	18	rs11663834	504	-2.20568	0.0274
SM	MAPRE2	18	rs355317	376	-2.11442	0.0345
SM	L3MBTL4	18	rs9947929	546	2.055	0.0399
WB	AC007228.11	19	rs12608516	491	-2.858	0.00426
WB	CTD-3138B18.5	19	rs12972447	338	2.517	0.01184
WB	C19orf54	19	rs10414006	410	-2.40166	0.01632
WB	NAPSB	19	rs1726773	376	-2.37103	0.01774
WB	PPP1R14A	19	rs10426809	350	-2.30176	0.02135
WB	FCGRT	19	rs7256146	352	-2.146	0.03187
WB	RCN3	19	rs7256146	351	-2.146	0.03187
WB	C19orf40	19	rs11880965	421	-2.00173	0.04531
SM	CTC-429P9.5	19	rs6512158	380	3.28102	0.00103
SM	SHD	19	rs2052059	371	-2.7219	0.00649
SM	EGLN2	19	rs10414006	432	-2.60804	0.00911
SM	ZSCAN18	19	rs12972447	438	2.3144	0.02065
SM	NDUFA7	19	rs11669069	361	2.23	0.02575
SM	CD209	19	rs11669069	399	-2.20086	0.02775
SM	CD33	19	rs7245800	647	-2.08747	0.03685
SM	CARM1	19	rs2075022	378	2.071	0.03836
SM	OSCAR	19	rs3170255	455	2.06657	0.03877
SM	CCDC61	19	rs7248294	417	2.056	0.03978
SM	ZNF426	19	rs16996444	354	2.04	0.04135
SM	CTD-2540F13.2	19	rs10426809	411	2.03623	0.04173
SM	AP1M1	19	rs370978	458	-2.036	0.04175
SM	ZNF229	19	rs2722756	452	-2.022	0.04318
SM	CTD-2538C1.2	19	rs16966885	404	-2.00542	0.04492
SM	ZNF471	19	rs12608516	507	2.00479	0.04499
SM	C19orf44	19	rs4808547	396	-1.997	0.04583
SM	CD320	19	rs11669069	367	1.98771	0.04684
SM	CTD-3105H18.4	19	rs407796	270	1.981	0.04759
WB	LINC00493	20	rs6035106	466	-2.333	0.0196
WB	OPRL1	20	rs6090040	290	1.9986	0.0457
SM	LINC00493	20	rs6035106	474	3.58108	0.000342
SM	SIRPB1	20	rs6080550	626	-2.86234	0.004205
SM	DTD1	20	rs6075463	484	2.78537	0.005347
SM	TAF4	20	rs6142900	548	-2.652	0.008002
SM	RBBP9	20	rs6035106	473	2.57522	0.010018
SM	LSM14B	20	rs6142900	541	2.539	0.011117
SM	SEC23B	20	rs6035106	480	2.51382	0.011943
SM	RPRD1B	20	rs6122759	482	2.291	0.021963
SM	RP4-785G19.5	20	rs2747565	300	2.23527	0.0254
SM	ACSS1	20	rs8114713	483	-2.18	0.029257
SM	EDEM2	20	rs2425019	345	2.151	0.031476
SM	TTLL9	20	rs6061043	314	-2.099	0.035817
SM	RGS19	20	rs13036542	315	-2.09458	0.036209
SM	WI2-87327B8.1	20	rs6062238	509	-2.07497	0.037989
SM	OPRL1	20	rs13036542	315	-2.01	0.044431
WB	RRP1B	21	rs230634	408	-3.007	0.00264
SM	HSF2BP	21	rs230634	409	-2.726	0.00641
SM	SETD4	21	rs7278507	504	-1.9882	0.04679
SM	CBR1	21	rs7278507	512	-1.9782	0.0479
WB	PMM1	22	rs17002737	298	-2.4393	0.0147
WB	COX5BP7	22	rs17000751	386	2.2201	0.0264
SM	L3MBTL2	22	rs137831	268	2.05956	0.0394
SM	RP5-1039K5.17	22	rs9917559	375	2.01491	0.0439
SM	RP1-41P2.7	22	rs134432	435	1.994	0.0462
SM	APOL5	22	rs5750083	449	1.991	0.0465
Note: The large-scale Genome-Wide Association Study (GWAS) summary data for Juvenile Idiopathic Arthritis (JIA) acquired from an Asian cohort study, including 110 JIA patients and 173,268 controls. The TWAS.P and TWAS.Z values were calculated by the FUSION approach (http://gusevlab.org/projects/fusion/). TWAS: Transcriptome-Wide Association Study; GWAS: Genome-Wide Association Study; JIA: Juvenil…

## Sheet: Supplmental Table2
Supplementary Table 2: Candidate genes identified by transcriptome-wide association study (TWAS) analysis (European population).
PANEL	ID	CHR	BEST.GWAS.ID	NSNP	TWAS.Z	TWAS.P
WB	SMIM1	1	rs947354	440	-2.384	0.01713
WB	RERE	1	rs9435151	527	-1.996	0.04593
WB	CD52	1	rs2257255	381	-2.0975	0.03595
WB	WASF2	1	rs546096	261	2.188	0.02867
WB	RP11-422J8.1	1	rs4653279	440	-2.599	0.00935
WB	TESK2	1	rs9429072	317	2.0497	0.04039
WB	GSTM1	1	rs6667402	440	-2.2302	0.02573
WB	AC000032.2	1	rs6667402	433	-2.4578	0.01398
WB	SLC22A15	1	rs4839498	494	2.352	0.01867
WB	NOTCH2NL	1	rs12091564	112	2.318	0.02045
WB	CTSK	1	rs7412746	284	-2.5309	0.01138
WB	ARNT	1	rs7412746	298	-2.4779	0.01322
WB	RP11-316M1.12	1	rs7412746	294	2.509	0.01211
WB	RP11-350G8.9	1	rs1891805	387	2.1974	0.02799
WB	MNDA	1	rs860780	478	-2.1355	0.03272
WB	EFCAB2	1	rs6693918	539	2.695	0.00704
SM	MSH4	1	rs1146634	463	2.36	0.018176
SM	NRD1	1	rs11205843	207	-2.14	0.032679
SM	EPS15	1	rs11205843	208	-2.03	0.042154
SM	OLFML3	1	rs6674384	472	-1.98	0.047276
SM	PHTF1	1	rs6674384	494	2.02	0.043593
SM	CAMSAP2	1	rs296547	550	2.59	0.009649
SM	HEATR1	1	rs604070	643	-3.33	0.000871
SM	MYOG	1	rs4325195	517	1.99	0.046152
SM	CEP85	1	rs2257255	429	-2.38	0.017241
SM	LRRC47	1	rs947354	470	-2.8	0.005126
SM	MMACHC	1	rs9429072	283	2.98	0.002852
SM	GSTM5	1	rs6667402	441	-2.24	0.024786
SM	CEPT1	1	rs2885805	579	2.01	0.044954
SM	CTSK	1	rs7412746	296	-2.45	0.014163
SM	ARNT	1	rs7412746	305	-2.06	0.038968
SM	GOLPH3L	1	rs7412746	304	2.61	0.008975
SM	NDUFS2	1	rs2501864	375	2.35	0.018875
SM	GPBP1L1	1	rs9429072	287	-2.35	0.01867
SM	TM2D1	1	rs7540527	489	-2.45	0.014167
SM	RPRD2	1	rs12125650	266	2.26	0.02368
SM	CTSS	1	rs7412746	304	-2.28	0.022467
SM	SLC22A15	1	rs4839498	476	2.36	0.018226
SM	MEAF6	1	rs4653279	450	2.28	0.022846
SM	TNFRSF18	1	rs4314833	234	2.67	0.00754
SM	CDC42SE1	1	rs7412746	321	-2.25	0.024486
SM	S100A6	1	rs12116563	429	-2.12	0.034262
SM	EFCAB2	1	rs6693918	475	2.49	0.01285
SM	AKR7L	1	rs16862800	501	2.41	0.015804
SM	NOTCH2NL	1	rs12091564	101	2.19	0.02848
SM	LINC00568	1	rs7412746	282	3.01	0.002642
SM	RP5-1115A15.1	1	rs6690548	306	-2.12	0.03426
SM	DDOST	1	rs1689924	459	2.65	0.008117
SM	RP5-1126H10.2	1	rs851123	508	1.99	0.046922
SM	RP11-156E8.1	1	rs6693918	465	-2.5	0.012249
WB	LCLAT1	2	rs11887956	608	2.1537	0.0313
WB	ATP6V1E2	2	rs3814043	682	2.542	0.011
WB	RTN4	2	rs13021245	587	2.073	0.0382
WB	GNLY	2	rs1130866	466	2.1612	0.0307
WB	POLR1B	2	rs3811050	431	-2.235	0.0254
WB	ASNSD1	2	rs16831873	288	-2.099	0.0358
WB	GLB1L	2	rs7596389	380	2.394	0.0167
WB	UBE2F	2	rs11901174	494	2.202	0.0277
SM	CPS1	2	rs2287420	346	-2.101	0.03564
SM	CUL3	2	rs12613725	431	2.352	0.01867
SM	LY75	2	rs7573119	445	-2.263	0.02364
SM	PMS1	2	rs16831873	315	2.19711	0.02801
SM	ZC3H15	2	rs2084488	293	-2.10176	0.03557
SM	CCNT2	2	rs626501	372	-2.003	0.04518
SM	MTIF2	2	rs13021245	492	-2.18906	0.02859
SM	GNLY	2	rs1130866	474	2.64484	0.00817
SM	CRIPT	2	rs3814043	666	-2.014	0.04401
SM	CCDC93	2	rs2288102	478	-2.66325	0.00774
SM	ORMDL1	2	rs16831873	315	2.66619	0.00767
SM	MRPS9	2	rs6749140	481	2.66877	0.00761
SM	SMEK2	2	rs12990534	431	-2.50038	0.01241
SM	PPP1R1C	2	rs1196290	414	2.3064	0.02109
SM	AGAP1	2	rs11692659	495	1.985	0.04714
SM	ING5	2	rs12472418	236	2.31294	0.02073
SM	TMEM194B	2	rs2008952	373	-2.08817	0.03678
SM	SLC23A3	2	rs7596389	377	-2.469	0.01355
SM	RAB6C	2	rs10928942	257	-2.15788	0.03094
SM	AC079776.7	2	rs10928942	257	-2.00164	0.04532
SM	IDH1-AS1	2	rs10186531	372	-2.389	0.01689
SM	ATP6V1E2	2	rs3814043	672	3.01003	0.00261
SM	AC068134.10	2	rs10167702	394	-2.283	0.02243
SM	OSGEPL1-AS1	2	rs16831873	317	-2.099	0.03582
SM	RP11-254F7.2	2	rs11674480	579	-2.13054	0.03313
SM	RP11-449G16.1	2	rs12475793	298	-2.109	0.03494
WB	IL17RC	3	rs17747739	470	2.117	0.0343
WB	CMTM8	3	rs6796318	517	-2.2558	0.0241
WB	MCCC1	3	rs6443862	442	-1.9887	0.0467
SM	IL17RC	3	rs17747739	470	2.117	0.0343
SM	CMTM8	3	rs6796318	517	-2.2558	0.0241
SM	MCCC1	3	rs6443862	442	-1.9887	0.0467
WB	COPS4	4	rs906148	453	-2.0162	0.04378
WB	RP11-218F10.3	4	rs4472093	381	3.07	0.00214
SM	COPS4	4	rs906148	453	-2.0162	0.04378
SM	RP11-218F10.3	4	rs4472093	381	3.07	0.00214
WB	AMACR	5	rs10941095	413	2.321	0.0203
WB	AC034220.3	5	rs2706399	418	2.2169	0.0266
WB	YIPF5	5	rs6864309	418	-2.051	0.0403
SM	AMACR	5	rs10941095	413	2.321	0.0203
SM	AC034220.3	5	rs2706399	418	2.2169	0.0266
SM	YIPF5	5	rs6864309	418	-2.051	0.0403
WB	ZNRD1	6	rs2735059	38	3.1435	0.00167
WB	XXbac-BPG299F13.17	6	rs3819299	168	5.0986	3.42e-07
WB	HCG27	6	rs3819299	168	-7.6997	1.36e-14
WB	HLA-C	6	rs3819299	196	3.7354	0.000187
WB	HLA-B	6	rs3819299	207	4.9008	9.54e-07
WB	XXbac-BPG248L24.12	6	rs3819299	207	3.9294	8.52e-05
WB	XXbac-BPG181B23.7	6	rs3819299	228	2.6905	0.00713
WB	MICB	6	rs3819299	264	-5.0312	4.87e-07
WB	LY6G5C	6	rs3819299	228	3.4025	0.000668
WB	C4A	6	rs652888	209	3.3615	0.000775
WB	XXbac-BPG300A18.13	6	rs28421666	159	2.1012	0.0356
WB	HLA-DRB5	6	rs28421666	248	6.47	9.8e-11
WB	HLA-DRB1	6	rs28421666	233	6.47	9.8e-11
WB	HLA-DQA1	6	rs28421666	210	4.78	1.75e-06
WB	HLA-DQB1	6	rs28421666	217	3.8859	0.000102
WB	HLA-DOB	6	rs28421666	253	2.8136	0.0049
WB	ETV7	6	rs236375	480	2.374	0.0176
SM	ZNRD1	6	rs2735059	38	3.1435	0.00167
SM	XXbac-BPG299F13.17	6	rs3819299	168	5.0986	3.42e-07
SM	HCG27	6	rs3819299	168	-7.6997	1.36e-14
SM	HLA-C	6	rs3819299	196	3.7354	0.000187
SM	HLA-B	6	rs3819299	207	4.9008	9.54e-07
SM	XXbac-BPG248L24.12	6	rs3819299	207	3.9294	8.52e-05
SM	XXbac-BPG181B23.7	6	rs3819299	228	2.6905	0.00713
SM	MICB	6	rs3819299	264	-5.0312	4.87e-07
SM	LY6G5C	6	rs3819299	228	3.4025	0.000668
SM	C4A	6	rs652888	209	3.3615	0.000775
SM	XXbac-BPG300A18.13	6	rs28421666	159	2.1012	0.0356
SM	HLA-DRB5	6	rs28421666	248	6.47	9.8e-11
SM	HLA-DRB1	6	rs28421666	233	6.47	9.8e-11
SM	HLA-DQA1	6	rs28421666	210	4.78	1.75e-06
SM	HLA-DQB1	6	rs28421666	217	3.8859	0.000102
SM	HLA-DOB	6	rs28421666	253	2.8136	0.0049
SM	ETV7	6	rs236375	480	2.374	0.0176
WB	RP11-611L7.1	7	rs10250100	311	-2.681	0.00734
WB	GIGYF1	7	rs2405442	272	-2.437	0.01481
WB	EPHB4	7	rs2405442	314	2.414	0.01578
WB	METTL2B	7	rs4728142	375	-2.3292	0.01985
WB	RP11-274B21.10	7	rs13225818	347	1.961	0.04988
WB	IRF5	7	rs13225818	326	-2.769	0.00562
WB	ABCF2	7	rs17635967	531	-2.5973	0.0094
SM	RP11-611L7.1	7	rs10250100	311	-2.681	0.00734
SM	GIGYF1	7	rs2405442	272	-2.437	0.01481
SM	EPHB4	7	rs2405442	314	2.414	0.01578
SM	METTL2B	7	rs4728142	375	-2.3292	0.01985
SM	RP11-274B21.10	7	rs13225818	347	1.961	0.04988
SM	IRF5	7	rs13225818	326	-2.769	0.00562
SM	ABCF2	7	rs17635967	531	-2.5973	0.0094
WB	SMIM19	8	rs2974298	264	-2.067	0.03873
WB	CHD7	8	rs1552071	494	2.328	0.01991
WB	RP11-383J24.6	8	rs7015300	536	-2.6508	0.00803
WB	TRMT12	8	rs7015300	527	2.4138	0.01579
WB	MROH6	8	rs13257849	333	-2.102	0.03555
SM	SMIM19	8	rs2974298	264	-2.067	0.03873
SM	CHD7	8	rs1552071	494	2.328	0.01991
SM	RP11-383J24.6	8	rs7015300	536	-2.6508	0.00803
SM	TRMT12	8	rs7015300	527	2.4138	0.01579
SM	MROH6	8	rs13257849	333	-2.102	0.03555
WB	SMU1	9	rs10733465	473	-2.23	0.025747
WB	SEMA4D	9	rs7029876	477	2.4268	0.015234
WB	RP11-165J3.6	9	rs10761237	473	-2.744	0.00607
WB	HIATL1	9	rs7027606	422	-3.062	0.002199
WB	CORO2A	9	rs16913573	608	2.6463	0.008139
WB	TLR4	9	rs2253966	566	2.019	0.043487
WB	PSMD5-AS1	9	rs1359329	370	-2.0277	0.042588
WB	FCN1	9	rs10858298	641	-3.3224	0.000892
WB	ABCA2	9	rs4880119	346	2.027	0.042662
WB	NPDC1	9	rs4880119	337	2.2834	0.022407
SM	SMU1	9	rs10733465	473	-2.23	0.025747
SM	SEMA4D	9	rs7029876	477	2.4268	0.015234
SM	RP11-165J3.6	9	rs10761237	473	-2.744	0.00607
SM	HIATL1	9	rs7027606	422	-3.062	0.002199
SM	CORO2A	9	rs16913573	608	2.6463	0.008139
SM	TLR4	9	rs2253966	566	2.019	0.043487
SM	PSMD5-AS1	9	rs1359329	370	-2.0277	0.042588
SM	FCN1	9	rs10858298	641	-3.3224	0.000892
SM	ABCA2	9	rs4880119	346	2.027	0.042662
SM	NPDC1	9	rs4880119	337	2.2834	0.022407
WB	LHPP	10	rs908365	576	2.25905	0.0239
WB	MGMT	10	rs1008982	749	2.06532	0.0389
SM	LHPP	10	rs908365	576	2.25905	0.0239
SM	MGMT	10	rs1008982	749	2.06532	0.0389
WB	RIC8A	11	rs3817637	268	2.228	0.02588
WB	PSMD13	11	rs3817637	283	2.228	0.02588
WB	TMEM80	11	rs3817637	449	2.4323	0.015
WB	SVIP	11	rs7930872	434	2.165	0.03039
WB	RIN1	11	rs1791682	294	3.2589	0.00112
WB	RP11-867G23.12	11	rs1791682	294	3.2687	0.00108
WB	FOLR2	11	rs10793032	285	-1.9793	0.04778
WB	INTS4	11	rs35711367	376	-2.073	0.03817
SM	RIC8A	11	rs3817637	268	2.228	0.02588
SM	PSMD13	11	rs3817637	283	2.228	0.02588
SM	TMEM80	11	rs3817637	449	2.4323	0.015
SM	SVIP	11	rs7930872	434	2.165	0.03039
SM	RIN1	11	rs1791682	294	3.2589	0.00112
SM	RP11-867G23.12	11	rs1791682	294	3.2687	0.00108
SM	FOLR2	11	rs10793032	285	-1.9793	0.04778
SM	INTS4	11	rs35711367	376	-2.073	0.03817
WB	EIF4B	12	rs684471	587	3.7139	0.000204
WB	GLIPR1	12	rs735637	502	-2.0998	0.035749
WB	RP3-462E2.3	12	rs653178	203	3.773	0.000161
WB	TMEM116	12	rs653178	199	2.754	0.005887
SM	EIF4B	12	rs684471	587	3.7139	0.000204
SM	GLIPR1	12	rs735637	502	-2.0998	0.035749
SM	RP3-462E2.3	12	rs653178	203	3.773	0.000161
SM	TMEM116	12	rs653178	199	2.754	0.005887
WB	COG6	13	rs4941961	613	-2.1531	0.0313
WB	CDC16	13	rs7983955	200	-2.3657	0.018
SM	COG6	13	rs4941961	613	-2.1531	0.0313
SM	CDC16	13	rs7983955	200	-2.3657	0.018
WB	DHRS1	14	rs2295308	484	-2.06071	0.03933
WB	CBLN3	14	rs2295308	541	-2.17165	0.02988
WB	CHURC1	14	rs11622366	480	2.52198	0.01167
WB	RAB15	14	rs11622366	483	-2.15709	0.031
WB	RP11-529H20.6	14	rs11160070	494	2.13153	0.03305
WB	RP11-529H20.5	14	rs11160070	497	2.586	0.00971
WB	PAPOLA	14	rs12878184	579	-2.27481	0.02292
SM	DHRS1	14	rs2295308	484	-2.06071	0.03933
SM	CBLN3	14	rs2295308	541	-2.17165	0.02988
SM	CHURC1	14	rs11622366	480	2.52198	0.01167
SM	RAB15	14	rs11622366	483	-2.15709	0.031
SM	RP11-529H20.6	14	rs11160070	494	2.13153	0.03305
SM	RP11-529H20.5	14	rs11160070	497	2.586	0.00971
SM	PAPOLA	14	rs12878184	579	-2.27481	0.02292
WB	C15orf65	15	rs7168436	422	-3.1153	0.00184
SM	C15orf65	15	rs7168436	422	-3.1153	0.00184
WB	RP11-166B2.1	16	rs7185522	475	-1.981	0.0476
WB	EIF3C	16	rs7498329	197	-2.1597	0.0308
WB	TUFM	16	rs7498329	172	-2.109	0.0349
WB	MIR4721	16	rs7498329	172	-2.057	0.0397
WB	SPNS1	16	rs7498329	173	-2.1636	0.0305
WB	RP11-196G11.2	16	rs7500719	235	-2.1946	0.0282
WB	LCAT	16	rs9931987	256	-2.2864	0.0222
SM	RP11-166B2.1	16	rs7185522	475	-1.981	0.0476
SM	EIF3C	16	rs7498329	197	-2.1597	0.0308
SM	TUFM	16	rs7498329	172	-2.109	0.0349
SM	MIR4721	16	rs7498329	172	-2.057	0.0397
SM	SPNS1	16	rs7498329	173	-2.1636	0.0305
SM	RP11-196G11.2	16	rs7500719	235	-2.1946	0.0282
SM	LCAT	16	rs9931987	256	-2.2864	0.0222
WB	SCIMP	17	rs925599	464	2.05405	0.039971
WB	ACADVL	17	rs222835	457	-2.4	0.016395
WB	ELP5	17	rs222835	454	-2.49385	0.012637
WB	NT5M	17	rs12600635	416	1.97863	0.047857
WB	GGNBP2	17	rs8067860	321	-2.072	0.038265
WB	JUP	17	rs4796763	412	2.34091	0.019237
WB	TBKBP1	17	rs9901869	407	-2.466	0.013663
WB	LRRC46	17	rs9901869	379	-2.034	0.041952
WB	SCRN2	17	rs9901869	381	-2.10943	0.034907
WB	UBE2Z	17	rs3809770	388	3.4335	0.000596
SM	SCIMP	17	rs925599	464	2.05405	0.039971
SM	ACADVL	17	rs222835	457	-2.4	0.016395
SM	ELP5	17	rs222835	454	-2.49385	0.012637
SM	NT5M	17	rs12600635	416	1.97863	0.047857
SM	GGNBP2	17	rs8067860	321	-2.072	0.038265
SM	JUP	17	rs4796763	412	2.34091	0.019237
SM	TBKBP1	17	rs9901869	407	-2.466	0.013663
SM	LRRC46	17	rs9901869	379	-2.034	0.041952
SM	SCRN2	17	rs9901869	381	-2.10943	0.034907
SM	UBE2Z	17	rs3809770	388	3.4335	0.000596
WB	CTD-2286N8.2	18	rs2930996	446	2.037	0.0416
WB	AC139100.3	18	rs12970653	213	2.283	0.0224
SM	CTD-2286N8.2	18	rs2930996	446	2.037	0.0416
SM	AC139100.3	18	rs12970653	213	2.283	0.0224
WB	MED16	19	rs10402948	443	-2.1938	0.02825
WB	NCLN	19	rs9304900	397	2.335	0.01954
WB	ZNF266	19	rs12610468	388	-2.064	0.03902
WB	EMR2	19	rs12972670	452	2.6925	0.00709
WB	KCTD15	19	rs10418860	428	-2.1744	0.02967
WB	CTD-2527I21.14	19	rs7254124	470	-2.3146	0.02064
WB	GPR4	19	rs11669073	354	2.7723	0.00557
WB	JOSD2	19	rs2411335	436	2.361	0.01823
SM	MED16	19	rs10402948	443	-2.1938	0.02825
SM	NCLN	19	rs9304900	397	2.335	0.01954
SM	ZNF266	19	rs12610468	388	-2.064	0.03902
SM	EMR2	19	rs12972670	452	2.6925	0.00709
SM	KCTD15	19	rs10418860	428	-2.1744	0.02967
SM	CTD-2527I21.14	19	rs7254124	470	-2.3146	0.02064
SM	GPR4	19	rs11669073	354	2.7723	0.00557
SM	JOSD2	19	rs2411335	436	2.361	0.01823
WB	CDS2	20	rs6037971	621	1.992	0.0464
SM	CDS2	20	rs6037971	621	1.992	0.0464
WB	CCT8	21	rs9982288	427	2.175	0.0296
WB	TMEM50B	21	rs8134847	457	-2.189	0.0286
SM	CCT8	21	rs9982288	427	2.175	0.0296
SM	TMEM50B	21	rs8134847	457	-2.189	0.0286
WB	UBE2L3	22	rs240065	320	-3.11058	0.00187
WB	COX5BP7	22	rs139358	386	-2.30392	0.02123
SM	RNF215	22	rs2283873	443	-2.12181	0.033854
SM	CCDC134	22	rs7364180	320	-3.29317	0.000991
SM	CENPM	22	rs7364180	347	-2.804	0.005047
SM	THOC5	22	rs2188120	409	2.38713	0.01698
SM	TTLL12	22	rs6003065	561	-2.12396	0.033674
SM	L3MBTL2	22	rs9611613	268	-2.93935	0.003289
SM	POLR3H	22	rs7364180	304	2.804	0.005047
SM	PMM1	22	rs7364180	310	2.7325	0.006286
SM	MEI1	22	rs7364180	309	-2.597	0.009404
SM	CSDC2	22	rs7364180	306	-2.86951	0.004111
SM	IGLV2-11	22	rs5759540	288	-2.00135	0.045354
SM	HMGB1P10	22	rs9608498	813	2.81217	0.004921
SM	RP1-85F18.5	22	rs9611613	266	2.38871	0.016907
SM	AC007308.6	22	rs12627919	432	3.19606	0.001393
SM	LL22NC03-2H8.4	22	rs240065	361	2.551	0.010741
Note: The large-scale Genome-Wide Association Study (GWAS) summary data for Juvenile Idiopathic Arthritis (JIA) acquired from an European cohort study, including 788 JIA patients and 172,834 controls. The TWAS.P and TWAS.Z values were calculated by the FUSION approach (http://gusevlab.org/projects/fusion/). TWAS: Transcriptome-Wide Association Study; GWAS: Genome-Wide Association Study; JIA: Juve…

## Sheet: Supplmental Table3 
Supplmental Table 3: Overlapped genes selected by transcriptome-wide association study (TWAS) analysis.
Tissue	Gene	CHR	BEST.GWAS.ID	NSNP	TWAS.Z	TWAS.P
SM+WB	CDC16	13	rs3993426	200	-3.1344	0.00172
SM+WB	PSMD5-AS1	9	rs1837	370	2.2031	0.0276
SM+WB	XXbac-BPG299F13.17	6	rs3819299	168	5.0986	3.42e-07
SM+WB	CHURC1	14	rs11622366	480	2.52198	0.01167
SM+WB	PMM1	22	rs7364180	310	2.7325	0.006286
WB	COX5BP7	22	rs139358	386	-2.30392	0.02123
SM	RPRD2	1	rs17581380	266	-2.49215	0.012697
SM	CPS1	2	rs1551610	346	-2.373	0.01764
SM	LY75	2	rs1551610	346	-2.373	0.01764
SM	L3MBTL2	22	rs137831	268	2.05956	0.0394
Note: The large-scale Genome-Wide Association Study (GWAS) summary data for juvenile idiopathic arthritis (JIA) acquired from the Asian and European cohort studies, including 898 JIA patients and 346,102 controls. The TWAS.P and TWAS.Z values were calculated by the FUSION approach (http://gusevlab.org/projects/fusion/). The mRNA expression profiles were downloaded from the Gene Expression Omnibus…

## Sheet: Supplmental Table4
Supplmental Table 4: Functional enrichment and annotation analysis identified by TWAS analysis.
_LogP_MyList	GO	Category	CategoryID	Description	PARENT_GO	LogP	Enrichment	Z-score	#TotalGeneInLibrary	#GeneInGO	#GeneInHitList	#GeneInGOAndHitList	%InGO	STDV %InGO	GeneID	Hits	Log(q-value)	EvidenceCutoff	GROUP_ID	FirstInGroupByEnrichment	FirstInGroupByLogP	BestLogPInGroup	BestEnrichmentInGroup
-7.91529	GO:0019882	GO Biological Processes	19	antigen processing and presentation	19_GO:0002376 immune system process	-7.91529	8.79953	9.18966	30211	93	443	12	2.7088	0.771301	1520|3106|3107|3112|3117|3119|3123|3127|5873|11277|30835|55080	CTSS|HLA-B|HLA-C|HLA-DOB|HLA-DQA1|HLA-DQB1|HLA-DRB1|HLA-DRB5|RAB27A|TREX1|CD209|TAPBPL	-3.74271	0	1	1	1	-7.91529	21.3114
-7.78837	GO:0048002	GO Biological Processes	19	antigen processing and presentation of peptide antigen	19_GO:0002376 immune system process	-7.78837	11.3661	9.80485	30211	60	443	10	2.25734	0.70573	1520|3106|3107|3112|3117|3119|3123|3127|30835|55080	CTSS|HLA-B|HLA-C|HLA-DOB|HLA-DQA1|HLA-DQB1|HLA-DRB1|HLA-DRB5|CD209|TAPBPL	-3.74271	0	1	0	0	-7.91529	21.3114
-7.39361	R-HSA-1280218	Reactome Gene Sets	6	Adaptive Immune System		-7.39361	2.94952	6.65371	30211	763	443	33	7.44921	1.24751	920|945|1513|1520|3106|3107|3112|3117|3119|3123|3127|4277|5719|6049|7099|7318|7332|8452|8454|8881|8907|9976|23295|30835|56654|64682|65264|79908|117145|126014|140691|140739|153579	CD4|CD33|CTSK|CTSS|HLA-B|HLA-C|HLA-DOB|HLA-DQA1|HLA-DQB1|HLA-DRB1|HLA-DRB5|MICB|PSMD13|RNF6|TLR4|UBA7|UBE2L3|CUL3|CUL1|CDC16|AP1M1|CLEC2B|MGRN1|CD209|NPDC1|ANAPC1|UBE2Z|BTNL8|THEM4|OSCAR|TRIM69|UBE2F|BTNL9	-3.52404	0	2	1	1	-7.39361	12.7868
-6.65663	hsa05416	KEGG Pathway	24	Viral myocarditis		-6.65663	10.2295	8.72978	30211	60	443	9	2.0316	0.670287	71|3106|3107|3112|3117|3119|3123|3127|5881	ACTG1|HLA-B|HLA-C|HLA-DOB|HLA-DQA1|HLA-DQB1|HLA-DRB1|HLA-DRB5|RAC3	-3.0029	0	1	0	0	-7.91529	21.3114
-6.63887	R-HSA-6798695	Reactome Gene Sets	6	Neutrophil degranulation		-6.63887	3.40982	6.49236	30211	480	443	24	5.41761	1.07549	175|945|1520|1650|2219|2950|3106|3107|3684|3687|3728|4332|5719|5873|8907|10326|10450|10694|10788|11010|11240|126014|160364|258010	AGA|CD33|CTSS|DDOST|FCN1|GSTP1|HLA-B|HLA-C|ITGAM|ITGAX|JUP|MNDA|PSMD13|RAB27A|AP1M1|SIRPB1|PPIE|CCT8|IQGAP2|GLIPR1|PADI2|OSCAR|CLEC12A|SVIP	-3.0029	0	3	1	1	-6.63887	3.40982
-6.50449	GO:0002396	GO Biological Processes	19	MHC protein complex assembly	19_GO:0009987 cellular process	-6.50449	20.4589	10.6193	30211	20	443	6	1.3544	0.549175	3112|3117|3119|3123|3127|55080	HLA-DOB|HLA-DQA1|HLA-DQB1|HLA-DRB1|HLA-DRB5|TAPBPL	-3.0029	0	1	0	0	-7.91529	21.3114
-6.50449	GO:0002501	GO Biological Processes	19	peptide antigen assembly with MHC protein complex	19_GO:0002376 immune system process	-6.50449	20.4589	10.6193	30211	20	443	6	1.3544	0.549175	3112|3117|3119|3123|3127|55080	HLA-DOB|HLA-DQA1|HLA-DQB1|HLA-DRB1|HLA-DRB5|TAPBPL	-3.0029	0	1	0	0	-7.91529	21.3114
-6.3756	hsa04145	KEGG Pathway	24	k		-6.3756	5.83259	7.28646	30211	152	443	13	2.93454	0.801863	71|1520|3106|3107|3112|3117|3119|3123|3127|3684|7099|30835|90423	ACTG1|CTSS|HLA-B|HLA-C|HLA-DOB|HLA-DQA1|HLA-DQB1|HLA-DRB1|HLA-DRB5|ITGAM|TLR4|CD209|ATP6V1E2	-2.93201	0	1	0	0	-7.91529	21.3114
-6.12372	WP2328	WikiPathways	27	Allograft Rejection		-6.12372	7.66252	7.67881	30211	89	443	10	2.25734	0.70573	720|729|3106|3107|3112|3117|3119|3123|3127|10578	C4A|C6|HLA-B|HLA-C|HLA-DOB|HLA-DQA1|HLA-DQB1|HLA-DRB1|HLA-DRB5|GNLY	-2.73128	0	1	0	0	-7.91529	21.3114
-5.92632	GO:0002381	GO Biological Processes	19	immunoglobulin production involved in immunoglobulin-mediated immune response	19_GO:0002376 immune system process	-5.92632	12.5625	8.70034	30211	38	443	7	1.58014	0.592498	3112|3117|3119|3123|3127|118460|165918	HLA-DOB|HLA-DQA1|HLA-DQB1|HLA-DRB1|HLA-DRB5|EXOSC6|RNF168	-2.62103	0	1	0	0	-7.91529	21.3114
-5.92632	hsa05330	KEGG Pathway	24	Allograft rejection		-5.92632	12.5625	8.70034	30211	38	443	7	1.58014	0.592498	3106|3107|3112|3117|3119|3123|3127	HLA-B|HLA-C|HLA-DOB|HLA-DQA1|HLA-DQB1|HLA-DRB1|HLA-DRB5	-2.62103	0	1	0	0	-7.91529	21.3114
-5.66654	hsa04612	KEGG Pathway	24	Antigen processing and presentation		-5.66654	7.86881	7.40986	30211	78	443	9	2.0316	0.670287	920|1520|3106|3107|3112|3117|3119|3123|3127	CD4|CTSS|HLA-B|HLA-C|HLA-DOB|HLA-DQA1|HLA-DQB1|HLA-DRB1|HLA-DRB5	-2.42561	0	1	0	0	-7.91529	21.3114
-5.61832	hsa05332	KEGG Pathway	24	Graft-versus-host disease		-5.61832	11.3661	8.20088	30211	42	443	7	1.58014	0.592498	3106|3107|3112|3117|3119|3123|3127	HLA-B|HLA-C|HLA-DOB|HLA-DQA1|HLA-DQB1|HLA-DRB1|HLA-DRB5	-2.42561	0	1	0	0	-7.91529	21.3114
-5.5962	GO:0002399	GO Biological Processes	19	MHC class II protein complex assembly	19_GO:0009987 cellular process	-5.5962	21.3114	9.91366	30211	16	443	5	1.12867	0.501899	3112|3117|3119|3123|3127	HLA-DOB|HLA-DQA1|HLA-DQB1|HLA-DRB1|HLA-DRB5	-2.42561	0	1	0	0	-7.91529	21.3114
-5.5962	GO:0002503	GO Biological Processes	19	peptide antigen assembly with MHC class II protein complex	19_GO:0002376 immune system process	-5.5962	21.3114	9.91366	30211	16	443	5	1.12867	0.501899	3112|3117|3119|3123|3127	HLA-DOB|HLA-DQA1|HLA-DQB1|HLA-DRB1|HLA-DRB5	-2.42561	0	1	0	0	-7.91529	21.3114
-5.54664	hsa04940	KEGG Pathway	24	Type I diabetes mellitus		-5.54664	11.1017	8.08648	30211	43	443	7	1.58014	0.592498	3106|3107|3112|3117|3119|3123|3127	HLA-B|HLA-C|HLA-DOB|HLA-DQA1|HLA-DQB1|HLA-DRB1|HLA-DRB5	-2.40408	0	1	0	0	-7.91529	21.3114
-5.40853	WP4217	WikiPathways	27	Ebola virus pathway in host		-5.40853	5.72641	6.61349	30211	131	443	11	2.48307	0.73932	71|2060|3106|3107|3112|3117|3119|3123|3127|7099|30835	ACTG1|EPS15|HLA-B|HLA-C|HLA-DOB|HLA-DQA1|HLA-DQB1|HLA-DRB1|HLA-DRB5|TLR4|CD209	-2.2923	0	1	0	0	-7.91529	21.3114
-5.3732	GO:0019886	GO Biological Processes	19	antigen processing and presentation of exogenous peptide antigen via MHC class II	19_GO:0002376 immune system process	-5.3732	13.6393	8.44926	30211	30	443	6	1.3544	0.549175	1520|3112|3117|3119|3123|3127	CTSS|HLA-DOB|HLA-DQA1|HLA-DQB1|HLA-DRB1|HLA-DRB5	-2.28179	0	1	0	0	-7.91529	21.3114
-5.20038	GO:0002495	GO Biological Processes	19	antigen processing and presentation of peptide antigen via MHC class II	19_GO:0002376 immune system process	-5.20038	12.7868	8.13808	30211	32	443	6	1.3544	0.549175	1520|3112|3117|3119|3123|3127	CTSS|HLA-DOB|HLA-DQA1|HLA-DQB1|HLA-DRB1|HLA-DRB5	-2.1411	0	1	0	0	-7.91529	21.3114
-5.18676	R-HSA-202430	Reactome Gene Sets	6	Translocation of ZAP-70 to Immunological synapse		-5.18676	17.9464	9.01387	30211	19	443	5	1.12867	0.501899	920|3117|3119|3123|3127	CD4|HLA-DQA1|HLA-DQB1|HLA-DRB1|HLA-DRB5	-2.1411	0	1	0	0	-7.91529	21.3114
-5.11862	GO:0002504	GO Biological Processes	19	antigen processing and presentation of peptide or polysaccharide antigen via MHC class II	19_GO:0002376 immune system process	-5.11862	12.3993	7.99271	30211	33	443	6	1.3544	0.549175	1520|3112|3117|3119|3123|3127	CTSS|HLA-DOB|HLA-DQA1|HLA-DQB1|HLA-DRB1|HLA-DRB5	-2.09415	0	1	0	0	-7.91529	21.3114
-4.92169	hsa05320	KEGG Pathway	24	Autoimmune thyroid disease		-4.92169	9.00707	7.11726	30211	53	443	7	1.58014	0.592498	3106|3107|3112|3117|3119|3123|3127	HLA-B|HLA-C|HLA-DOB|HLA-DQA1|HLA-DQB1|HLA-DRB1|HLA-DRB5	-1.91743	0	1	0	0	-7.91529	21.3114
-4.87246	hsa04514	KEGG Pathway	24	Cell adhesion molecules		-4.87246	5.03463	6.02269	30211	149	443	11	2.48307	0.73932	920|3106|3107|3112|3117|3119|3123|3127|3684|8506|9672	CD4|HLA-B|HLA-C|HLA-DOB|HLA-DQA1|HLA-DQB1|HLA-DRB1|HLA-DRB5|ITGAM|CNTNAP1|SDC3	-1.8875	0	1	0	0	-7.91529	21.3114
-4.84751	R-HSA-202427	Reactome Gene Sets	6	Phosphorylation of CD3 and TCR zeta chains		-4.84751	15.4992	8.29913	30211	22	443	5	1.12867	0.501899	920|3117|3119|3123|3127	CD4|HLA-DQA1|HLA-DQB1|HLA-DRB1|HLA-DRB5	-1.88103	0	1	0	0	-7.91529	21.3114
-4.80682	hsa04640	KEGG Pathway	24	Hematopoietic cell lineage		-4.80682	6.19967	6.32159	30211	99	443	9	2.0316	0.670287	920|921|945|3112|3117|3119|3123|3127|3684	CD4|CD5|CD33|HLA-DOB|HLA-DQA1|HLA-DQB1|HLA-DRB1|HLA-DRB5|ITGAM	-1.85808	0	1	0	0	-7.91529	21.3114
-4.74887	GO:0002478	GO Biological Processes	19	antigen processing and presentation of exogenous peptide antigen	19_GO:0002376 immune system process	-4.74887	10.7679	7.34994	30211	38	443	6	1.3544	0.549175	1520|3112|3117|3119|3123|3127	CTSS|HLA-DOB|HLA-DQA1|HLA-DQB1|HLA-DRB1|HLA-DRB5	-1.83098	0	1	0	0	-7.91529	21.3114
-4.7463	R-HSA-389948	Reactome Gene Sets	6	PD-1 signaling		-4.7463	14.8253	8.0914	30211	23	443	5	1.12867	0.501899	920|3117|3119|3123|3127	CD4|HLA-DQA1|HLA-DQB1|HLA-DRB1|HLA-DRB5	-1.83098	0	1	0	0	-7.91529	21.3114
-4.68928	GO:0043603	GO Biological Processes	19	cellular amide metabolic process	19_GO:0008152 metabolic process	-4.68928	2.45507	4.92258	30211	750	443	27	6.09481	1.13664	16|20|1373|1975|2944|2949|2950|4528|4701|6296|6487|7284|8663|8801|10985|25974|54460|55854|56922|57470|80222|81555|84532|94101|254552|283459|653308	AARS1|ABCA2|CPS1|EIF4B|GSTM1|GSTM5|GSTP1|MTIF2|NDUFA7|ACSM3|ST3GAL3|TUFM|EIF3C|SUCLG2|GCN1|MMACHC|MRPS21|ZC3H15|MCCC1|LRRC47|TARS2|YIPF5|ACSS1|ORMDL1|NUDT8|GATC|ASAH2B	-1.78976	0	4	1	1	-4.68928	15.7376
-4.51373	GO:0090156	GO Biological Processes	19	cellular sphingolipid homeostasis	19_GO:0065007 biological regulation	-4.51373	40.9178	10.8895	30211	5	443	3	0.677201	0.389656	20|57142|94101	ABCA2|RTN4|ORMDL1	-1.62944	0	5	1	1	-4.51373	40.9178
-4.33249	hsa05321	KEGG Pathway	24	Inflammatory bowel disease		-4.33249	7.34423	6.2463	30211	65	443	7	1.58014	0.592498	3112|3117|3119|3123|3127|3595|7099	HLA-DOB|HLA-DQA1|HLA-DQB1|HLA-DRB1|HLA-DRB5|IL12RB2|TLR4	-1.46293	0	1	0	0	-7.91529	21.3114
-4.20733	GO:0019884	GO Biological Processes	19	antigen processing and presentation of exogenous antigen	19_GO:0002376 immune system process	-4.20733	8.70592	6.44958	30211	47	443	6	1.3544	0.549175	1520|3112|3117|3119|3123|3127	CTSS|HLA-DOB|HLA-DQA1|HLA-DQB1|HLA-DRB1|HLA-DRB5	-1.352	0	1	0	0	-7.91529	21.3114
-4.16215	hsa05323	KEGG Pathway	24	Rheumatoid arthritis		-4.16215	5.86636	5.7337	30211	93	443	8	1.80587	0.63268	1513|3112|3117|3119|3123|3127|7099|90423	CTSK|HLA-DOB|HLA-DQA1|HLA-DQB1|HLA-DRB1|HLA-DRB5|TLR4|ATP6V1E2	-1.32061	0	1	0	0	-7.91529	21.3114
-4.11624	hsa05152	KEGG Pathway	24	Tuberculosis		-4.11624	4.16756	5.1997	30211	180	443	11	2.48307	0.73932	1520|3112|3117|3119|3123|3127|3684|3687|7099|8844|30835	CTSS|HLA-DOB|HLA-DQA1|HLA-DQB1|HLA-DRB1|HLA-DRB5|ITGAM|ITGAX|TLR4|KSR1|CD209	-1.28813	0	1	0	0	-7.91529	21.3114
-4.10334	hsa04672	KEGG Pathway	24	Intestinal immune network for IgA production		-4.10334	8.35058	6.28191	30211	49	443	6	1.3544	0.549175	3112|3117|3119|3123|3127|4055	HLA-DOB|HLA-DQA1|HLA-DQB1|HLA-DRB1|HLA-DRB5|LTBR	-1.28813	0	1	0	0	-7.91529	21.3114
-4.08499	hsa05310	KEGG Pathway	24	Asthma		-4.08499	10.9994	6.79514	30211	31	443	5	1.12867	0.501899	3112|3117|3119|3123|3127	HLA-DOB|HLA-DQA1|HLA-DQB1|HLA-DRB1|HLA-DRB5	-1.28237	0	1	0	0	-7.91529	21.3114
-4.05318	GO:0032543	GO Biological Processes	19	mitochondrial translation	19_GO:0008152 metabolic process	-4.05318	8.18357	6.20161	30211	50	443	6	1.3544	0.549175	4528|4701|7284|54460|80222|283459	MTIF2|NDUFA7|TUFM|MRPS21|TARS2|GATC	-1.2628	0	4	0	0	-4.68928	15.7376
-3.98897	GO:0000226	GO Biological Processes	19	microtubule cytoskeleton organization	19_GO:0009987 cellular process	-3.98897	2.6179	4.54432	30211	521	443	20	4.51467	0.98646	6905|9419|9851|10426|10806|10982|23224|23271|26073|27436|55012|55036|55592|64946|84722|85478|89876|164395|165186|729440	TBCE|CRIPT|KIAA0753|TUBGCP3|SDCCAG8|MAPRE2|SYNE2|CAMSAP2|POLDIP2|EML4|PPP2R3C|CCDC40|GOLGA2P5|CENPH|PSRC1|CCDC65|CFAP91|TTLL9|TOGARAM2|CCDC61	-1.21048	0	6	1	1	-3.98897	4.39977
-3.90893	GO:0009100	GO Biological Processes	19	glycoprotein metabolic process	19_GO:0008152 metabolic process	-3.90893	3.09984	4.67894	30211	330	443	15	3.386	0.859334	175|1650|5372|6487|8704|10905|11277|55741|55768|57452|79625|83857|91869|126792|442117	AGA|DDOST|PMM1|ST3GAL3|B4GALT2|MAN1A2|TREX1|EDEM2|NGLY1|GALNT16|NDNF|TMTC1|RFT1|B3GALT6|GALNTL6	-1.14203	0	7	1	1	-3.90893	7.0548
-3.88646	R-HSA-202433	Reactome Gene Sets	6	Generation of second messenger molecules		-3.88646	10.0289	6.42596	30211	34	443	5	1.12867	0.501899	920|3117|3119|3123|3127	CD4|HLA-DQA1|HLA-DQB1|HLA-DRB1|HLA-DRB5	-1.13084	0	1	0	0	-7.91529	21.3114
-3.85958	hsa05140	KEGG Pathway	24	Leishmaniasis		-3.85958	6.19967	5.57308	30211	77	443	7	1.58014	0.592498	3112|3117|3119|3123|3127|3684|7099	HLA-DOB|HLA-DQA1|HLA-DQB1|HLA-DRB1|HLA-DRB5|ITGAM|TLR4	-1.11496	0	1	0	0	-7.91529	21.3114
-3.78782	R-HSA-983169	Reactome Gene Sets	6	Class I MHC mediated antigen processing & presentation		-3.78782	2.89428	4.51503	30211	377	443	16	3.61174	0.886479	1520|3106|3107|5719|6049|7099|7318|7332|8452|8454|8881|23295|64682|65264|140691|140739	CTSS|HLA-B|HLA-C|PSMD13|RNF6|TLR4|UBA7|UBE2L3|CUL3|CUL1|CDC16|MGRN1|ANAPC1|UBE2Z|TRIM69|UBE2F	-1.05392	0	2	0	0	-7.39361	12.7868
-3.7439	GO:0007017	GO Biological Processes	19	microtubule-based process	19_GO:0009987 cellular process	-3.7439	2.23448	4.21329	30211	763	443	25	5.64334	1.09636	1952|3801|6652|6905|9419|9851|10426|10806|10982|23224|23271|23287|26073|27436|55012|55036|55592|56912|64946|84722|85478|89876|164395|165186|729440	CELSR2|KIFC3|SORD|TBCE|CRIPT|KIAA0753|TUBGCP3|SDCCAG8|MAPRE2|SYNE2|CAMSAP2|AGTPBP1|POLDIP2|EML4|PPP2R3C|CCDC40|GOLGA2P5|IFT46|CENPH|PSRC1|CCDC65|CFAP91|TTLL9|TOGARAM2|CCDC61	-1.02046	0	6	0	0	-3.98897	4.39977
-3.69667	GO:0070085	GO Biological Processes	19	glycosylation	19_GO:0008152 metabolic process	-3.69667	3.48237	4.66032	30211	235	443	12	2.7088	0.771301	1650|5372|6487|8704|10905|25839|57452|57511|83857|91869|126792|442117	DDOST|PMM1|ST3GAL3|B4GALT2|MAN1A2|COG4|GALNT16|COG6|TMTC1|RFT1|B3GALT6|GALNTL6	-0.985993	0	7	0	0	-3.90893	7.0548
-3.67968	GO:0002460	GO Biological Processes	19	adaptive immune response based on somatic recombination of immune receptors built from immunoglobulin superfamily domains	19_GO:0002376 immune system process	-3.67968	3.46761	4.64254	30211	236	443	12	2.7088	0.771301	720|729|3112|3117|3119|3123|3127|5873|7099|11277|118460|165918	C4A|C6|HLA-DOB|HLA-DQA1|HLA-DQB1|HLA-DRB1|HLA-DRB5|RAB27A|TLR4|TREX1|EXOSC6|RNF168	-0.985993	0	1	0	0	-7.91529	21.3114
-3.67947	GO:0016064	GO Biological Processes	19	immunoglobulin mediated immune response	19_GO:0002376 immune system process	-3.67947	4.03529	4.82705	30211	169	443	10	2.25734	0.70573	720|729|3112|3117|3119|3123|3127|11277|118460|165918	C4A|C6|HLA-DOB|HLA-DQA1|HLA-DQB1|HLA-DRB1|HLA-DRB5|TREX1|EXOSC6|RNF168	-0.985993	0	1	0	0	-7.91529	21.3114
-3.64981	GO:0006450	GO Biological Processes	19	regulation of translational fidelity	19_GO:0065007 biological regulation	-3.64981	12.9898	6.7049	30211	21	443	4	0.902935	0.449424	16|80222|92675|283459	AARS1|TARS2|DTD1|GATC	-0.96588	0	4	0	0	-4.68928	15.7376
-3.59752	GO:0019724	GO Biological Processes	19	B cell mediated immunity	19_GO:0002376 immune system process	-3.59752	3.94199	4.73403	30211	173	443	10	2.25734	0.70573	720|729|3112|3117|3119|3123|3127|11277|118460|165918	C4A|C6|HLA-DOB|HLA-DQA1|HLA-DQB1|HLA-DRB1|HLA-DRB5|TREX1|EXOSC6|RNF168	-0.922933	0	1	0	0	-7.91529	21.3114
-3.58652	hsa04120	KEGG Pathway	24	Ubiquitin mediated proteolysis		-3.58652	4.32231	4.84091	30211	142	443	9	2.0316	0.670287	7318|7332|8452|8454|8881|23295|64682|65264|140739	UBA7|UBE2L3|CUL3|CUL1|CDC16|MGRN1|ANAPC1|UBE2Z|UBE2F	-0.921078	0	2	0	0	-7.39361	12.7868
-3.55218	GO:0048193	GO Biological Processes	19	Golgi vesicle transport	19_GO:0051179 localization	-3.55218	3.16626	4.44254	30211	280	443	13	2.93454	0.801863	2060|8452|9905|10483|11014|23499|25839|54520|55204|57511|81555|84084|200312	EPS15|CUL3|SGSM2|SEC23B|KDELR2|MACF1|COG4|CCDC93|GOLPH3L|COG6|YIPF5|RAB6C|RNF215	-0.895693	0	8	1	1	-3.55218	5.45571
-3.51801	GO:0006399	GO Biological Processes	19	tRNA metabolic process	19_GO:0008152 metabolic process	-3.51801	3.8529	4.64376	30211	177	443	10	2.25734	0.70573	16|23587|55039|55798|57470|80222|92675|131965|283459|283989	AARS1|ELP5|TRMT12|METTL2B|LRRC47|TARS2|DTD1|METTL6|GATC|TSEN54	-0.870298	0	9	1	1	-3.51801	3.87479
-3.40864	R-HSA-877300	Reactome Gene Sets	6	Interferon gamma signaling		-3.40864	5.24588	4.94838	30211	91	443	7	1.58014	0.592498	3106|3107|3117|3119|3123|3127|3663	HLA-B|HLA-C|HLA-DQA1|HLA-DQB1|HLA-DRB1|HLA-DRB5|IRF5	-0.769526	0	1	0	0	-7.91529	21.3114
-3.3797	hsa04658	KEGG Pathway	24	Th1 and Th2 cell differentiation		-3.3797	5.18886	4.90876	30211	92	443	7	1.58014	0.592498	920|3112|3117|3119|3123|3127|3595	CD4|HLA-DOB|HLA-DQA1|HLA-DQB1|HLA-DRB1|HLA-DRB5|IL12RB2	-0.74902	0	1	0	0	-7.91529	21.3114
-3.34492	CORUM:5233	CORUM	33	TNF-alpha/NF-kappa B signaling complex 5		-3.34492	10.9114	6.04791	30211	25	443	4	0.902935	0.449424	4528|8454|10788|84172	MTIF2|CUL1|IQGAP2|POLR1B	-0.731803	0	10	1	1	-3.34492	10.9114
-3.32535	hsa05166	KEGG Pathway	24	Human T-cell leukemia virus 1 infection		-3.32535	3.3791	4.34021	30211	222	443	11	2.48307	0.73932	920|3106|3107|3112|3117|3119|3123|3127|4055|8881|64682	CD4|HLA-B|HLA-C|HLA-DOB|HLA-DQA1|HLA-DQB1|HLA-DRB1|HLA-DRB5|LTBR|CDC16|ANAPC1	-0.731803	0	1	0	0	-7.91529	21.3114
-3.32477	GO:0043951	GO Biological Processes	19	negative regulation of cAMP-mediated signaling	19_GO:0023052 signaling	-3.32477	18.599	7.1217	30211	11	443	3	0.677201	0.389656	4987|5138|23295	OPRL1|PDE2A|MGRN1	-0.731803	0	12	1	1	-3.32477	18.599
-3.32477	R-HSA-1236977	Reactome Gene Sets	6	Endosomal/Vacuolar pathway		-3.32477	18.599	7.1217	30211	11	443	3	0.677201	0.389656	1520|3106|3107	CTSS|HLA-B|HLA-C	-0.731803	0	11	1	1	-3.32477	18.599
-3.32261	R-HSA-2132295	Reactome Gene Sets	6	MHC class II antigen presentation		-3.32261	4.43554	4.6575	30211	123	443	8	1.80587	0.63268	1513|1520|3112|3117|3119|3123|3127|8907	CTSK|CTSS|HLA-DOB|HLA-DQA1|HLA-DQB1|HLA-DRB1|HLA-DRB5|AP1M1	-0.731803	0	1	0	0	-7.91529	21.3114
-3.29915	R-HSA-9707564	Reactome Gene Sets	6	Cytoprotection by HMOX1		-3.29915	4.39977	4.62778	30211	124	443	8	1.80587	0.63268	4363|5719|8452|8454|9167|10498|51241|64839	ABCC1|PSMD13|CUL3|CUL1|COX7A2L|CARM1|COX16|FBXL17	-0.715888	0	13	1	1	-3.29915	7.57738
-3.27739	GO:0006517	GO Biological Processes	19	protein deglycosylation	19_GO:0008152 metabolic process	-3.27739	10.4918	5.90663	30211	26	443	4	0.902935	0.449424	175|10905|55741|55768	AGA|MAN1A2|EDEM2|NGLY1	-0.708643	0	14	1	1	-3.27739	10.4918
-3.27718	R-HSA-388841	Reactome Gene Sets	6	Costimulation by the CD28 family		-3.27718	5.93012	5.00148	30211	69	443	6	1.3544	0.549175	920|3117|3119|3123|3127|117145	CD4|HLA-DQA1|HLA-DQB1|HLA-DRB1|HLA-DRB5|THEM4	-0.708643	0	1	0	0	-7.91529	21.3114
-3.26769	hsa05150	KEGG Pathway	24	Staphylococcus aureus infection		-3.26769	4.97265	4.75584	30211	96	443	7	1.58014	0.592498	720|3112|3117|3119|3123|3127|3684	C4A|HLA-DOB|HLA-DQA1|HLA-DQB1|HLA-DRB1|HLA-DRB5|ITGAM	-0.706337	0	1	0	0	-7.91529	21.3114
-3.26059	GO:0002449	GO Biological Processes	19	lymphocyte mediated immunity	19_GO:0002376 immune system process	-3.26059	3.31929	4.26934	30211	226	443	11	2.48307	0.73932	720|729|3112|3117|3119|3123|3127|5873|11277|118460|165918	C4A|C6|HLA-DOB|HLA-DQA1|HLA-DQB1|HLA-DRB1|HLA-DRB5|RAB27A|TREX1|EXOSC6|RNF168	-0.706296	0	1	0	0	-7.91529	21.3114
-3.21382	R-HSA-202424	Reactome Gene Sets	6	Downstream TCR signaling		-3.21382	4.87117	4.68253	30211	98	443	7	1.58014	0.592498	920|3117|3119|3123|3127|5719|8454	CD4|HLA-DQA1|HLA-DQB1|HLA-DRB1|HLA-DRB5|PSMD13|CUL1	-0.677434	0	1	0	0	-7.91529	21.3114
-3.21278	GO:0021680	GO Biological Processes	19	cerebellar Purkinje cell layer development	19_GO:0032502 developmental process	-3.21278	10.1032	5.77283	30211	27	443	4	0.902935	0.449424	16|473|8704|23287	AARS1|RERE|B4GALT2|AGTPBP1	-0.677434	0	15	1	1	-3.21278	10.1032
-3.20713	R-HSA-9711123	Reactome Gene Sets	6	Cellular response to chemical stress		-3.20713	3.83605	4.38779	30211	160	443	9	2.0316	0.670287	2950|4363|5719|8452|8454|9167|10498|51241|64839	GSTP1|ABCC1|PSMD13|CUL3|CUL1|COX7A2L|CARM1|COX16|FBXL17	-0.677434	0	13	0	0	-3.29915	7.57738
-3.20458	R-HSA-8851680	Reactome Gene Sets	6	Butyrophilin (BTN) family interactions		-3.20458	17.0491	6.7834	30211	12	443	3	0.677201	0.389656	30835|79908|153579	CD209|BTNL8|BTNL9	-0.677434	0	16	1	1	-3.20458	17.0491
-3.18576	GO:0034660	GO Biological Processes	19	ncRNA metabolic process	19_GO:0008152 metabolic process	-3.18576	2.46668	3.90938	30211	470	443	17	3.83747	0.912691	16|23076|23587|55039|55127|55636|55798|57470|80222|84549|92105|92675|112479|118460|131965|283459|283989	AARS1|RRP1B|ELP5|TRMT12|HEATR1|CHD7|METTL2B|LRRC47|TARS2|MAK16|INTS4|DTD1|ERI2|EXOSC6|METTL6|GATC|TSEN54	-0.665147	0	9	0	0	-3.51801	3.87479
-3.15503	GO:0002443	GO Biological Processes	19	leukocyte mediated immunity	19_GO:0002376 immune system process	-3.15503	3.03095	4.08931	30211	270	443	12	2.7088	0.771301	720|729|3112|3117|3119|3123|3127|5873|11277|118460|165918|284021	C4A|C6|HLA-DOB|HLA-DQA1|HLA-DQB1|HLA-DRB1|HLA-DRB5|RAB27A|TREX1|EXOSC6|RNF168|MILR1	-0.643063	0	1	0	0	-7.91529	21.3114
-3.1509	GO:0018130	GO Biological Processes	19	heterocycle biosynthetic process	19_GO:0008152 metabolic process	-3.1509	2.07179	3.72389	30211	790	443	24	5.41761	1.07549	471|905|1373|1635|5092|5372|5558|6827|6874|6920|10025|11077|11277|23475|26073|30834|51513|60313|80146|84172|84532|91750|171568|221264	ATIC|CCNT2|CPS1|DCTD|PCBD1|PMM1|PRIM2|SUPT4H1|TAF4|TCEA3|MED16|HSF2BP|TREX1|QPRT|POLDIP2|POLR1H|ETV7|GPBP1L1|UXS1|POLR1B|ACSS1|LIN52|POLR3H|AK9	-0.643063	0	17	1	1	-3.1509	4.75789
-3.1282	GO:0051603	GO Biological Processes	19	proteolysis involved in cellular protein catabolic process	19_GO:0008152 metabolic process	-3.1282	2.2433	3.77801	30211	608	443	20	4.51467	0.98646	1513|1520|5719|6049|7318|7332|8452|8454|8881|55048|55741|55768|57333|64682|64839|65264|78991|92714|165918|200312	CTSK|CTSS|PSMD13|RNF6|UBA7|UBE2L3|CUL3|CUL1|CDC16|VPS37C|EDEM2|NGLY1|RCN3|ANAPC1|FBXL17|UBE2Z|PCYOX1L|ARRDC1|RNF168|RNF215	-0.631438	0	2	0	0	-7.39361	12.7868
-3.12143	GO:0002831	GO Biological Processes	19	regulation of response to biotic stimulus	19_GO:0050896 response to stimulus	-3.12143	2.72008	3.95422	30211	351	443	14	3.16027	0.831165	2219|3106|3123|4277|4332|5495|7099|11277|23170|26060|55012|59307|163702|388325	FCN1|HLA-B|HLA-DRB1|MICB|MNDA|PPM1B|TLR4|TREX1|TTLL12|APPL1|PPP2R3C|SIGIRR|IFNLR1|SCIMP	-0.631438	0	18	1	1	-3.12143	3.91933
-3.11965	R-HSA-913531	Reactome Gene Sets	6	Interferon Signaling		-3.11965	3.42695	4.19028	30211	199	443	10	2.25734	0.70573	3106|3107|3117|3119|3123|3127|3663|5495|7318|9972	HLA-B|HLA-C|HLA-DQA1|HLA-DQB1|HLA-DRB1|HLA-DRB5|IRF5|PPM1B|UBA7|NUP153	-0.631438	0	1	0	0	-7.91529	21.3114
-3.1148	R-HSA-6807505	Reactome Gene Sets	6	RNA polymerase II transcribes snRNA genes		-3.1148	5.52944	4.75896	30211	74	443	6	1.3544	0.549175	905|6827|23248|58490|64859|92105	CCNT2|SUPT4H1|RPRD2|RPRD1B|NABP1|INTS4	-0.631438	0	19	1	1	-3.1148	6.81964
-3.09537	GO:0106074	GO Biological Processes	19	aminoacyl-tRNA metabolism involved in translational fidelity	19_GO:0008152 metabolic process	-3.09537	15.7376	6.48355	30211	13	443	3	0.677201	0.389656	16|80222|92675	AARS1|TARS2|DTD1	-0.623748	0	4	0	0	-4.68928	15.7376
-3.09537	GO:0009235	GO Biological Processes	19	cobalamin metabolic process	19_GO:0008152 metabolic process	-3.09537	15.7376	6.48355	30211	13	443	3	0.677201	0.389656	4363|25974|51293	ABCC1|MMACHC|CD320	-0.623748	0	20	1	1	-3.09537	15.7376
-3.05056	GO:0002250	GO Biological Processes	19	adaptive immune response	19_GO:0002376 immune system process	-3.05056	2.21058	3.70627	30211	617	443	20	4.51467	0.98646	720|729|920|1520|3106|3107|3112|3117|3119|3123|3127|4277|5873|7099|11277|28816|30835|79908|118460|165918	C4A|C6|CD4|CTSS|HLA-B|HLA-C|HLA-DOB|HLA-DQA1|HLA-DQB1|HLA-DRB1|HLA-DRB5|MICB|RAB27A|TLR4|TREX1|IGLV2-11|CD209|BTNL8|EXOSC6|RNF168	-0.584692	0	1	0	0	-7.91529	21.3114
-2.99737	GO:0006518	GO Biological Processes	19	peptide metabolic process	19_GO:0008152 metabolic process	-2.99737	2.37084	3.72823	30211	489	443	17	3.83747	0.912691	16|1975|2944|2949|2950|4528|4701|7284|8663|10985|25974|54460|55854|57470|80222|81555|283459	AARS1|EIF4B|GSTM1|GSTM5|GSTP1|MTIF2|NDUFA7|TUFM|EIF3C|GCN1|MMACHC|MRPS21|ZC3H15|LRRC47|TARS2|YIPF5|GATC	-0.537178	0	4	0	0	-4.68928	15.7376
-2.98151	GO:0034654	GO Biological Processes	19	nucleobase-containing compound biosynthetic process	19_GO:0008152 metabolic process	-2.98151	2.08958	3.60467	30211	718	443	22	4.96614	1.03216	471|905|1635|5372|5558|6827|6874|6920|10025|11077|11277|23475|26073|30834|51513|60313|80146|84172|84532|91750|171568|221264	ATIC|CCNT2|DCTD|PMM1|PRIM2|SUPT4H1|TAF4|TCEA3|MED16|HSF2BP|TREX1|QPRT|POLDIP2|POLR1H|ETV7|GPBP1L1|UXS1|POLR1B|ACSS1|LIN52|POLR3H|AK9	-0.526921	0	17	0	0	-3.1509	4.75789
-2.92633	GO:0036297	GO Biological Processes	19	interstrand cross-link repair	19_GO:0050896 response to stimulus	-2.92633	8.52455	5.19524	30211	32	443	4	0.902935	0.449424	55159|91442|165918|375748	RFWD3|FAAP24|RNF168|ERCC6L2	-0.477272	0	21	1	1	-2.92633	8.52455
-2.88085	GO:0140053	GO Biological Processes	19	mitochondrial gene expression	19_GO:0008152 metabolic process	-2.88085	4.98998	4.41355	30211	82	443	6	1.3544	0.549175	4528|4701|7284|54460|80222|283459	MTIF2|NDUFA7|TUFM|MRPS21|TARS2|GATC	-0.443915	0	4	0	0	-4.68928	15.7376
-2.87801	GO:0006790	GO Biological Processes	19	sulfur compound metabolic process	19_GO:0008152 metabolic process	-2.87801	2.67841	3.74562	30211	331	443	13	2.93454	0.801863	1373|2944|2949|2950|6296|6487|8801|25974|56922|79625|84532|126792|254552	CPS1|GSTM1|GSTM5|GSTP1|ACSM3|ST3GAL3|SUCLG2|MMACHC|MCCC1|NDNF|ACSS1|B3GALT6|NUDT8	-0.443915	0	22	1	1	-2.87801	7.0548
-2.87667	GO:0044257	GO Biological Processes	19	cellular protein catabolic process	19_GO:0008152 metabolic process	-2.87667	2.13782	3.54354	30211	638	443	20	4.51467	0.98646	1513|1520|5719|6049|7318|7332|8452|8454|8881|55048|55741|55768|57333|64682|64839|65264|78991|92714|165918|200312	CTSK|CTSS|PSMD13|RNF6|UBA7|UBE2L3|CUL3|CUL1|CDC16|VPS37C|EDEM2|NGLY1|RCN3|ANAPC1|FBXL17|UBE2Z|PCYOX1L|ARRDC1|RNF168|RNF215	-0.443915	0	2	0	0	-7.39361	12.7868
-2.87152	hsa05145	KEGG Pathway	24	Toxoplasmosis		-2.87152	4.26227	4.21945	30211	112	443	7	1.58014	0.592498	3112|3117|3119|3123|3127|3915|7099	HLA-DOB|HLA-DQA1|HLA-DQB1|HLA-DRB1|HLA-DRB5|LAMC1|TLR4	-0.443915	0	1	0	0	-7.91529	21.3114
-2.85052	GO:0006486	GO Biological Processes	19	protein glycosylation	19_GO:0008152 metabolic process	-2.85052	3.15724	3.88153	30211	216	443	10	2.25734	0.70573	1650|5372|6487|8704|10905|57452|83857|91869|126792|442117	DDOST|PMM1|ST3GAL3|B4GALT2|MAN1A2|GALNT16|TMTC1|RFT1|B3GALT6|GALNTL6	-0.433253	0	7	0	0	-3.90893	7.0548
-2.85052	GO:0043413	GO Biological Processes	19	macromolecule glycosylation	19_GO:0008152 metabolic process	-2.85052	3.15724	3.88153	30211	216	443	10	2.25734	0.70573	1650|5372|6487|8704|10905|57452|83857|91869|126792|442117	DDOST|PMM1|ST3GAL3|B4GALT2|MAN1A2|GALNT16|TMTC1|RFT1|B3GALT6|GALNTL6	-0.433253	0	7	0	0	-3.90893	7.0548
-2.82587	WP4950	WikiPathways	27	16p11.2 distal deletion syndrome		-2.82587	8.0231	4.99842	30211	34	443	4	0.902935	0.449424	7284|10806|83985|100616256	TUFM|SDCCAG8|SPNS1|MIR4721	-0.413688	0	23	1	1	-2.82587	8.0231
-2.81775	GO:0031145	GO Biological Processes	19	anaphase-promoting complex-dependent catabolic process	19_GO:0008152 metabolic process	-2.81775	12.7868	5.75296	30211	16	443	3	0.677201	0.389656	8452|8881|64682	CUL3|CDC16|ANAPC1	-0.410581	0	2	0	0	-7.39361	12.7868
-2.80174	R-HSA-556833	Reactome Gene Sets	6	Metabolism of lipids		-2.80174	2.022	3.43851	30211	742	443	22	4.96614	1.03216	37|405|873|2166|4363|5019|6296|8760|9256|9453|10001|10025|10390|10498|11010|23600|79411|94101|117145|219541|253558|375775	ACADVL|ARNT|CBR1|FAAH|ABCC1|OXCT1|ACSM3|CDS2|TSPOAP1|GGPS1|MED6|MED16|CEPT1|CARM1|GLIPR1|AMACR|GLB1L|ORMDL1|THEM4|MED19|LCLAT1|PNPLA7	-0.399541	0	24	1	1	-2.80174	7.57738
-2.77411	WP4022	WikiPathways	27	Pyrimidine metabolism		-2.77411	4.75789	4.25728	30211	86	443	6	1.3544	0.549175	1635|5558|30834|56953|84172|171568	DCTD|PRIM2|POLR1H|NT5M|POLR1B|POLR3H	-0.376818	0	17	0	0	-3.1509	4.75789
-2.76266	GO:0002377	GO Biological Processes	19	immunoglobulin production	19_GO:0002376 immune system process	-2.76266	3.63714	3.94984	30211	150	443	8	1.80587	0.63268	3112|3117|3119|3123|3127|28816|118460|165918	HLA-DOB|HLA-DQA1|HLA-DQB1|HLA-DRB1|HLA-DRB5|IGLV2-11|EXOSC6|RNF168	-0.370217	0	1	0	0	-7.91529	21.3114
-2.73963	GO:0019438	GO Biological Processes	19	aromatic compound biosynthetic process	19_GO:0008152 metabolic process	-2.73963	1.9631	3.36577	30211	799	443	23	5.19187	1.0541	471|905|1635|5092|5372|5558|6827|6874|6920|10025|11077|11277|23475|26073|30834|51513|60313|80146|84172|84532|91750|171568|221264	ATIC|CCNT2|DCTD|PCBD1|PMM1|PRIM2|SUPT4H1|TAF4|TCEA3|MED16|HSF2BP|TREX1|QPRT|POLDIP2|POLR1H|ETV7|GPBP1L1|UXS1|POLR1B|ACSS1|LIN52|POLR3H|AK9	-0.355254	0	17	0	0	-3.1509	4.75789
-2.73815	GO:0046794	GO Biological Processes	19	transport of virus	19_GO:0016032 viral process	-2.73815	12.0347	5.55169	30211	17	443	3	0.677201	0.389656	2060|9972|30835	EPS15|NUP153|CD209	-0.355254	0	16	0	0	-3.20458	17.0491
-2.71963	GO:0000209	GO Biological Processes	19	protein polyubiquitination	19_GO:0008152 metabolic process	-2.71963	3.03095	3.73021	30211	225	443	10	2.25734	0.70573	6049|7332|8452|8454|8881|23295|64682|64839|165918|257218	RNF6|UBE2L3|CUL3|CUL1|CDC16|MGRN1|ANAPC1|FBXL17|RNF168|SHPRH	-0.341427	0	2	0	0	-7.39361	12.7868
-2.70861	GO:0002440	GO Biological Processes	19	production of molecular mediator of immune response	19_GO:0002376 immune system process	-2.70861	3.56582	3.88146	30211	153	443	8	1.80587	0.63268	3112|3117|3119|3123|3127|28816|118460|165918	HLA-DOB|HLA-DQA1|HLA-DQB1|HLA-DRB1|HLA-DRB5|IGLV2-11|EXOSC6|RNF168	-0.339652	0	1	0	0	-7.91529	21.3114
-2.70861	GO:0007051	GO Biological Processes	19	spindle organization	19_GO:0009987 cellular process	-2.70861	3.56582	3.88146	30211	153	443	8	1.80587	0.63268	6905|10426|10982|26073|55592|64946|165186|729440	TBCE|TUBGCP3|MAPRE2|POLDIP2|GOLGA2P5|CENPH|TOGARAM2|CCDC61	-0.339652	0	6	0	0	-3.98897	4.39977
-2.69933	R-HSA-202403	Reactome Gene Sets	6	TCR signaling		-2.69933	3.97812	3.98765	30211	120	443	7	1.58014	0.592498	920|3117|3119|3123|3127|5719|8454	CD4|HLA-DQA1|HLA-DQB1|HLA-DRB1|HLA-DRB5|PSMD13|CUL1	-0.334917	0	1	0	0	-7.91529	21.3114
-2.69031	GO:0009101	GO Biological Processes	19	glycoprotein biosynthetic process	19_GO:0008152 metabolic process	-2.69031	2.82015	3.63738	30211	266	443	11	2.48307	0.73932	1650|5372|6487|8704|10905|11277|57452|83857|91869|126792|442117	DDOST|PMM1|ST3GAL3|B4GALT2|MAN1A2|TREX1|GALNT16|TMTC1|RFT1|B3GALT6|GALNTL6	-0.330401	0	7	0	0	-3.90893	7.0548
-2.67797	GO:0008610	GO Biological Processes	19	lipid biosynthetic process	19_GO:0008152 metabolic process	-2.67797	2.15357	3.39186	30211	570	443	18	4.06321	0.938048	20|873|2944|2950|3931|5087|5191|6296|6487|8760|9453|10390|23600|51097|55151|84532|253558|653308	ABCA2|CBR1|GSTM1|GSTP1|LCAT|PBX1|PEX7|ACSM3|ST3GAL3|CDS2|GGPS1|CEPT1|AMACR|SCCPDH|TMEM38B|ACSS1|LCLAT1|ASAH2B	-0.322514	0	22	0	0	-2.87801	7.0548
-2.66369	GO:0002483	GO Biological Processes	19	antigen processing and presentation of endogenous peptide antigen	19_GO:0002376 immune system process	-2.66369	11.3661	5.3666	30211	18	443	3	0.677201	0.389656	3106|3107|3123	HLA-B|HLA-C|HLA-DRB1	-0.312642	0	11	0	0	-3.32477	18.599
-2.65818	R-HSA-983168	Reactome Gene Sets	6	Antigen processing: Ubiquitination & Proteasome degradation			2.6484	3.553	30211	309	443	12	2.7088	0.771301	5719|6049|7318|7332|8452|8454|8881|23295|64682|65264|140691|140739	PSMD13|RNF6|UBA7|UBE2L3|CUL3|CUL1|CDC16|MGRN1|ANAPC1|UBE2Z|TRIM69|UBE2F	-0.311491	0	2	0	0	-7.39361	12.7868
-2.65062	R-HSA-1280215	Reactome Gene Sets	6	Cytokine Signaling in Immune system		-2.65062	2.00297	3.31102	30211	715	443	21	4.74041	1.00963	920|3106|3107|3117|3119|3123|3127|3595|3663|3684|3687|4055|5495|5719|7318|8454|8784|9972|59307|84818|163702	CD4|HLA-B|HLA-C|HLA-DQA1|HLA-DQB1|HLA-DRB1|HLA-DRB5|IL12RB2|IRF5|ITGAM|ITGAX|LTBR|PPM1B|PSMD13|UBA7|CUL1|TNFRSF18|NUP153|SIGIRR|IL17RC|IFNLR1	-0.308254	0	1	0	0	-7.91529	21.3114
-2.61184	GO:1901137	GO Biological Processes	19	carbohydrate derivative biosynthetic process	19_GO:0008152 metabolic process	-2.61184	2.17921	3.34753	30211	532	443	17	3.83747	0.912691	471|1635|1650|5372|6487|8704|10905|11277|51097|57452|80146|83857|84532|91869|126792|221264|442117	ATIC|DCTD|DDOST|PMM1|ST3GAL3|B4GALT2|MAN1A2|TREX1|SCCPDH|GALNT16|UXS1|TMTC1|ACSS1|RFT1|B3GALT6|AK9|GALNTL6	-0.273759	0	7	0	0	-3.90893	7.0548
-2.60203	hsa00513	KEGG Pathway	24	Various types of N-glycan biosynthesis		-2.60203	6.9945	4.56968	30211	39	443	4	0.902935	0.449424	1650|6487|8704|10905	DDOST|ST3GAL3|B4GALT2|MAN1A2	-0.271717	0	7	0	0	-3.90893	7.0548
-2.60137	GO:0051225	GO Biological Processes	19	spindle assembly	19_GO:0009987 cellular process	-2.60137	4.39977	4.00571	30211	93	443	6	1.3544	0.549175	10426|10982|26073|55592|165186|729440	TUBGCP3|MAPRE2|POLDIP2|GOLGA2P5|TOGARAM2|CCDC61	-0.271717	0	6	0	0	-3.98897	4.39977
-2.5816	GO:0002694	GO Biological Processes	19	regulation of leukocyte activation	19_GO:0002376 immune system process	-2.5816	2.05999	3.27728	30211	629	443	19	4.28894	0.962618	920|921|945|3112|3117|3119|3123|3127|3684|4332|7099|10326|11277|30817|30835|51293|55012|118460|284021	CD4|CD5|CD33|HLA-DOB|HLA-DQA1|HLA-DQB1|HLA-DRB1|HLA-DRB5|ITGAM|MNDA|TLR4|SIRPB1|TREX1|ADGRE2|CD209|CD320|PPP2R3C|EXOSC6|MILR1	-0.256109	0	1	0	0	-7.91529	21.3114
-2.57316	GO:0045785	GO Biological Processes	19	positive regulation of cell adhesion	19_GO:0022610 biological adhesion	-2.57316	2.2936	3.35751	30211	446	443	15	3.386	0.859334	920|921|3112|3117|3119|3123|3127|3728|5881|6251|8784|10326|26073|30835|79625	CD4|CD5|HLA-DOB|HLA-DQA1|HLA-DQB1|HLA-DRB1|HLA-DRB5|JUP|RAC3|RSU1|TNFRSF18|SIRPB1|POLDIP2|CD209|NDNF	-0.251776	0	1	0	0	-7.91529	21.3114
-2.53465	GO:0000278	GO Biological Processes	19	mitotic cell cycle	19_GO:0009987 cellular process	-2.53465	2.08764	3.2491	30211	588	443	18	4.06321	0.938048	4221|6905|8452|8454|8881|10426|11277|26073|27436|55159|64682|64839|64859|64946|84084|84722|165186|729440	MEN1|TBCE|CUL3|CUL1|CDC16|TUBGCP3|TREX1|POLDIP2|EML4|RFWD3|ANAPC1|FBXL17|NABP1|CENPH|RAB6C|PSRC1|TOGARAM2|CCDC61	-0.218652	0	25	1	1	-2.53465	2.44352
-2.52791	GO:0046931	GO Biological Processes	19	pore complex assembly	19_GO:0009987 cellular process	-2.52791	10.2295	5.0368	30211	20	443	3	0.677201	0.389656	9972|10694|57142	NUP153|CCT8|RTN4	-0.218652	0	5	0	0	-4.51373	40.9178
-2.52791	GO:0098543	GO Biological Processes	19	detection of other organism	19_GO:0044419 biological process involved in interspecies interaction between organisms	-2.52791	10.2295	5.0368	30211	20	443	3	0.677201	0.389656	3106|3123|7099	HLA-B|HLA-DRB1|TLR4	-0.218652	0	11	0	0	-3.32477	18.599
-2.52167	GO:0051568	GO Biological Processes	19	histone H3-K4 methylation	19_GO:0008152 metabolic process	-2.52167	6.65331	4.41885	30211	41	443	4	0.902935	0.449424	4221|54093|54554|84193	MEN1|SETD4|WDR5B|SETD3	-0.216376	0	26	1	1	-2.52167	6.65331
-2.48319	R-HSA-8955332	Reactome Gene Sets	6	Carboxyterminal post-translational modifications of tubulin		-2.48319	6.49489	4.34716	30211	42	443	4	0.902935	0.449424	23170|23287|123624|164395	TTLL12|AGTPBP1|AGBL1|TTLL9	-0.186637	0	27	1	1	-2.48319	6.49489
-2.48041	GO:0006631	GO Biological Processes	19	fatty acid metabolic process	19_GO:0008152 metabolic process	-2.48041	2.51802	3.35651	30211	325	443	12	2.7088	0.771301	37|873|2166|2944|2950|5191|6296|23600|84532|117145|254552|653308	ACADVL|CBR1|FAAH|GSTM1|GSTP1|PEX7|ACSM3|AMACR|ACSS1|THEM4|NUDT8|ASAH2B	-0.186637	0	22	0	0	-2.87801	7.0548
-2.46706	R-HSA-198933	Reactome Gene Sets	6	Immunoregulatory interactions between a Lymphoid and a non-Lymphoid cell		-2.46706	3.61648	3.67514	30211	132	443	7	1.58014	0.592498	945|3106|3107|4277|9976|56654|126014	CD33|HLA-B|HLA-C|MICB|CLEC2B|NPDC1|OSCAR	-0.186637	0	11	0	0	-3.32477	18.599
-2.46568	GO:1903902	GO Biological Processes	19	positive regulation of viral life cycle	19_GO:0016032 viral process	-2.46568	9.74234	4.88887	30211	21	443	3	0.677201	0.389656	920|3123|30835	CD4|HLA-DRB1|CD209	-0.186637	0	1	0	0	-7.91529	21.3114
-2.46568	R-HSA-196741	Reactome Gene Sets	6	Cobalamin (Cbl, vitamin B12) transport and metabolism		-2.46568	9.74234	4.88887	30211	21	443	3	0.677201	0.389656	4363|25974|51293	ABCC1|MMACHC|CD320	-0.186637	0	20	0	0	-3.09537	15.7376
-2.46568	WP4884	WikiPathways	27	Pathogenesis of SARS-CoV-2 mediated by nsp9-nsp10 complex		-2.46568	9.74234	4.88887	30211	21	443	3	0.677201	0.389656	920|3123|3127	CD4|HLA-DRB1|HLA-DRB5	-0.186637	0	1	0	0	-7.91529	21.3114
-2.46514	GO:0030163	GO Biological Processes	19	protein catabolic process	19_GO:0008152 metabolic process	-2.46514	1.96815	3.14534	30211	693	443	20	4.51467	0.98646	1513|1520|5719|6049|7318|7332|8452|8454|8881|55048|55741|55768|57333|64682|64839|65264|78991|92714|165918|200312	CTSK|CTSS|PSMD13|RNF6|UBA7|UBE2L3|CUL3|CUL1|CDC16|VPS37C|EDEM2|NGLY1|RCN3|ANAPC1|FBXL17|UBE2Z|PCYOX1L|ARRDC1|RNF168|RNF215	-0.186637	0	2	0	0	-7.39361	12.7868
-2.45366	R-HSA-5668914	Reactome Gene Sets	6	Diseases of metabolism		-2.45366	2.78353	3.4194	30211	245	443	10	2.25734	0.70573	2328|2632|6487|9508|9672|25974|51293|56922|91869|126792	FMO3|GBE1|ST3GAL3|ADAMTS3|SDC3|MMACHC|CD320|MCCC1|RFT1|B3GALT6	-0.178855	0	20	0	0	-3.09537	15.7376
-2.44888	GO:0051251	GO Biological Processes	19	positive regulation of lymphocyte activation	19_GO:0002376 immune system process	-2.44888	2.38963	3.28541	30211	371	443	13	2.93454	0.801863	920|921|3112|3117|3119|3123|3127|7099|10326|30835|51293|55012|118460	CD4|CD5|HLA-DOB|HLA-DQA1|HLA-DQB1|HLA-DRB1|HLA-DRB5|TLR4|SIRPB1|CD209|CD320|PPP2R3C|EXOSC6	-0.177746	0	1	0	0	-7.91529	21.3114
-2.42709	M5880	Canonical Pathways	11	NABA ECM AFFILIATED		-2.42709	3.20924	3.52381	30211	170	443	8	1.80587	0.63268	2219|9672|9976|10507|30835|84898|114900|160364	FCN1|SDC3|CLEC2B|SEMA4D|CD209|PLXDC2|C1QTNF4|CLEC12A	-0.159585	0	28	1	1	-2.42709	3.20924
-2.40936	GO:0043039	GO Biological Processes	19	tRNA aminoacylation	19_GO:0008152 metabolic process	-2.40936	6.19967	4.21055	30211	44	443	4	0.902935	0.449424	16|57470|80222|283459	AARS1|LRRC47|TARS2|GATC	-0.153451	0	4	0	0	-4.68928	15.7376
-2.40848	GO:2000379	GO Biological Processes	19	positive regulation of reactive oxygen species metabolic process	19_GO:0048518 positive regulation of biological process	-2.40848	4.80256	3.91324	30211	71	443	5	1.12867	0.501899	873|2950|3684|5873|7099	CBR1|GSTP1|ITGAM|RAB27A|TLR4	-0.153451	0	29	1	1	-2.40848	4.80256
-2.40677	GO:0006412	GO Biological Processes	19	translation	19_GO:0008152 metabolic process	-2.40677	2.46493	3.2742	30211	332	443	12	2.7088	0.771301	16|1975|4528|4701|7284|8663|10985|54460|55854|57470|80222|283459	AARS1|EIF4B|MTIF2|NDUFA7|TUFM|EIF3C|GCN1|MRPS21|ZC3H15|LRRC47|TARS2|GATC	-0.153451	0	4	0	0	-4.68928	15.7376
-2.40671	R-HSA-3296482	Reactome Gene Sets	6	Defects in vitamin and cofactor metabolism		-2.40671	9.29951	4.75053	30211	22	443	3	0.677201	0.389656	25974|51293|56922	MMACHC|CD320|MCCC1	-0.153451	0	20	0	0	-3.09537	15.7376
-2.3957	hsa05322	KEGG Pathway	24	Systemic lupus erythematosus		-2.3957	3.51011	3.579	30211	136	443	7	1.58014	0.592498	720|729|3112|3117|3119|3123|3127	C4A|C6|HLA-DOB|HLA-DQA1|HLA-DQB1|HLA-DRB1|HLA-DRB5	-0.148112	0	1	0	0	-7.91529	21.3114
-2.39443	GO:0002696	GO Biological Processes	19	positive regulation of leukocyte activation	19_GO:0002376 immune system process	-2.39443	2.26781	3.19568	30211	421	443	14	3.16027	0.831165	920|921|3112|3117|3119|3123|3127|3684|7099|10326|30835|51293|55012|118460	CD4|CD5|HLA-DOB|HLA-DQA1|HLA-DQB1|HLA-DRB1|HLA-DRB5|ITGAM|TLR4|SIRPB1|CD209|CD320|PPP2R3C|EXOSC6	-0.148112	0	1	0	0	-7.91529	21.3114
-2.37391	GO:0043038	GO Biological Processes	19	amino acid activation	19_GO:0008152 metabolic process	-2.37391	6.0619	4.14537	30211	45	443	4	0.902935	0.449424	16|57470|80222|283459	AARS1|LRRC47|TARS2|GATC	-0.131028	0	4	0	0	-4.68928	15.7376
-2.35072	GO:0035162	GO Biological Processes	19	embryonic hemopoiesis	19_GO:0002376 immune system process	-2.35072	8.89518	4.62074	30211	23	443	3	0.677201	0.389656	5087|8563|79879	PBX1|THOC5|CCDC134	-0.114625	0	30	1	1	-2.35072	8.89518
-2.35072	GO:0034312	GO Biological Processes	19	diol biosynthetic process	19_GO:0008152 metabolic process	-2.35072	8.89518	4.62074	30211	23	443	3	0.677201	0.389656	20|5092|653308	ABCA2|PCBD1|ASAH2B	-0.114625	0	31	1	1	-2.35072	8.89518
-2.34593	GO:0030155	GO Biological Processes	19	regulation of cell adhesion	19_GO:0022610 biological adhesion	-2.34593	1.88437	3.01228	30211	760	443	21	4.74041	1.00963	71|920|921|1952|2828|3112|3117|3119|3123|3127|3728|4221|5881|6251|8784|10326|10507|23499|26073|30835|79625	ACTG1|CD4|CD5|CELSR2|GPR4|HLA-DOB|HLA-DQA1|HLA-DQB1|HLA-DRB1|HLA-DRB5|JUP|MEN1|RAC3|RSU1|TNFRSF18|SIRPB1|SEMA4D|MACF1|POLDIP2|CD209|NDNF	-0.113189	0	1	0	0	-7.91529	21.3114
-2.33224	GO:0002252	GO Biological Processes	19	immune effector process	19_GO:0002376 immune system process	-2.33224	2.23072	3.12824	30211	428	443	14	3.16027	0.831165	720|729|2219|3112|3117|3119|3123|3127|5873|7099|11277|118460|165918|284021	C4A|C6|FCN1|HLA-DOB|HLA-DQA1|HLA-DQB1|HLA-DRB1|HLA-DRB5|RAB27A|TLR4|TREX1|EXOSC6|RNF168|MILR1	-0.103512	0	1	0	0	-7.91529	21.3114
-2.32962	GO:0043604	GO Biological Processes	19	amide biosynthetic process	19_GO:0008152 metabolic process	-2.32962	2.15811	3.10023	30211	474	443	15	3.386	0.859334	16|1373|1975|4528|4701|6487|7284|8663|10985|54460|55854|57470|80222|84532|283459	AARS1|CPS1|EIF4B|MTIF2|NDUFA7|ST3GAL3|TUFM|EIF3C|GCN1|MRPS21|ZC3H15|LRRC47|TARS2|ACSS1|GATC	-0.103512	0	4	0	0	-4.68928	15.7376
-2.32462	GO:0034470	GO Biological Processes	19	ncRNA processing	19_GO:0008152 metabolic process	-2.32462	2.30873	3.14857	30211	384	443	13	2.93454	0.801863	16|23076|23587|55039|55127|55636|55798|84549|92105|112479|118460|131965|283989	AARS1|RRP1B|ELP5|TRMT12|HEATR1|CHD7|METTL2B|MAK16|INTS4|ERI2|EXOSC6|METTL6|TSEN54	-0.101788	0	9	0	0	-3.51801	3.87479
-2.31534	GO:0016570	GO Biological Processes	19	histone modification	19_GO:0008152 metabolic process	-2.31534	2.30274	3.13828	30211	385	443	13	2.93454	0.801863	4221|4485|6874|10498|11240|51780|54093|54554|57223|64769|84193|84289|165918	MEN1|MST1|TAF4|CARM1|PADI2|KDM3B|SETD4|WDR5B|PPP4R3B|MEAF6|SETD3|ING5|RNF168	-0.095761	0	26	0	0	-2.52167	6.65331
-2.30572	hsa00514	KEGG Pathway	24	Other types of O-glycan biosynthesis		-2.30572	5.80395	4.02073	30211	47	443	4	0.902935	0.449424	6487|8704|57452|442117	ST3GAL3|B4GALT2|GALNT16|GALNTL6	-0.0893704	0	7	0	0	-3.90893	7.0548
-2.28088	hsa04659	KEGG Pathway	24	Th17 cell differentiation		-2.28088	3.78869	3.54168	30211	108	443	6	1.3544	0.549175	920|3112|3117|3119|3123|3127	CD4|HLA-DOB|HLA-DQA1|HLA-DQB1|HLA-DRB1|HLA-DRB5	-0.067729	0	1	0	0	-7.91529	21.3114
-2.27401	GO:0046394	GO Biological Processes	19	carboxylic acid biosynthetic process	19_GO:0008152 metabolic process	-2.27401	2.62294	3.20616	30211	260	443	10	2.25734	0.70573	873|1373|2944|2950|5092|6296|23600|54529|84532|653308	CBR1|CPS1|GSTM1|GSTP1|PCBD1|ACSM3|AMACR|ASNSD1|ACSS1|ASAH2B	-0.0640447	0	22	0	0	-2.87801	7.0548
-2.26319	GO:0050867	GO Biological Processes	19	positive regulation of cell activation	19_GO:0048518 positive regulation of biological process	-2.26319	2.18979	3.05275	30211	436	443	14	3.16027	0.831165	920|921|3112|3117|3119|3123|3127|3684|7099|10326|30835|51293|55012|118460	CD4|CD5|HLA-DOB|HLA-DQA1|HLA-DQB1|HLA-DRB1|HLA-DRB5|ITGAM|TLR4|SIRPB1|CD209|CD320|PPP2R3C|EXOSC6	-0.0563861	0	1	0	0	-7.91529	21.3114
-2.25322	R-HSA-446203	Reactome Gene Sets	6	Asparagine N-linked glycosylation		-2.25322	2.46763	3.1374	30211	304	443	11	2.48307	0.73932	1650|5372|6487|8704|10905|11014|25839|55741|55768|57511|91869	DDOST|PMM1|ST3GAL3|B4GALT2|MAN1A2|KDELR2|COG4|EDEM2|NGLY1|COG6|RFT1	-0.052212	0	7	0	0	-3.90893	7.0548
-2.25121	GO:0016053	GO Biological Processes	19	organic acid biosynthetic process	19_GO:0008152 metabolic process	-2.25121	2.60292	3.17887	30211	262	443	10	2.25734	0.70573	873|1373|2944|2950|5092|6296|23600|54529|84532|653308	CBR1|CPS1|GSTM1|GSTP1|PCBD1|ACSM3|AMACR|ASNSD1|ACSS1|ASAH2B	-0.052212	0	22	0	0	-2.87801	7.0548
-2.24661	GO:0019883	GO Biological Processes	19	antigen processing and presentation of endogenous antigen	19_GO:0002376 immune system process	-2.24661	8.18357	4.38339	30211	25	443	3	0.677201	0.389656	3106|3107|3123	HLA-B|HLA-C|HLA-DRB1	-0.052212	0	11	0	0	-3.32477	18.599
-2.24661	GO:0098581	GO Biological Processes	19	detection of external biotic stimulus	19_GO:0050896 response to stimulus	-2.24661	8.18357	4.38339	30211	25	443	3	0.677201	0.389656	3106|3123|7099	HLA-B|HLA-DRB1|TLR4	-0.052212	0	11	0	0	-3.32477	18.599
-2.23463	hsa00980	KEGG Pathway	24	Metabolism of xenobiotics by cytochrome P450		-2.23463	4.37156	3.63714	30211	78	443	5	1.12867	0.501899	873|2944|2949|2950|246181	CBR1|GSTM1|GSTM5|GSTP1|AKR7L	-0.0432761	0	22	0	0	-2.87801	7.0548
-2.22892	GO:0007030	GO Biological Processes	19	Golgi organization	19_GO:0009987 cellular process	-2.22892	3.26969	3.35363	30211	146	443	7	1.58014	0.592498	3801|25839|55204|55592|57511|81555|339122	KIFC3|COG4|GOLPH3L|GOLGA2P5|COG6|YIPF5|RAB43	-0.0432398	0	8	0	0	-3.55218	5.45571
-2.22856	GO:0050870	GO Biological Processes	19	positive regulation of T cell activation	19_GO:0022610 biological adhesion	-2.22856	2.75232	3.20402	30211	223	443	9	2.0316	0.670287	920|921|3112|3117|3119|3123|3127|10326|30835	CD4|CD5|HLA-DOB|HLA-DQA1|HLA-DQB1|HLA-DRB1|HLA-DRB5|SIRPB1|CD209	-0.0432398	0	1	0	0	-7.91529	21.3114
-2.22224	GO:0000280	GO Biological Processes	19	nuclear division	19_GO:0009987 cellular process	-2.22224	2.44352	3.1012	30211	307	443	11	2.48307	0.73932	4438|5719|8452|11077|26073|27436|84722|150365|165186|284071|729440	MSH4|PSMD13|CUL3|HSF2BP|POLDIP2|EML4|PSRC1|MEI1|TOGARAM2|MEIOC|CCDC61	-0.0399029	0	25	0	0	-2.53465	2.44352
-2.21575	GO:0050865	GO Biological Processes	19	regulation of cell activation	19_GO:0050789 regulation of biological process	-2.21575	1.90269	2.90658	30211	681	443	19	4.28894	0.962618	920|921|945|3112|3117|3119|3123|3127|3684|4332|7099|10326|11277|30817|30835|51293|55012|118460|284021	CD4|CD5|CD33|HLA-DOB|HLA-DQA1|HLA-DQB1|HLA-DRB1|HLA-DRB5|ITGAM|MNDA|TLR4|SIRPB1|TREX1|ADGRE2|CD209|CD320|PPP2R3C|EXOSC6|MILR1	-0.0390491	0	1	0	0	-7.91529	21.3114
-2.21095	GO:0019941	GO Biological Processes	19	modification-dependent protein catabolic process	19_GO:0008152 metabolic process	-2.21095	2.03571	2.95141	30211	536	443	16	3.61174	0.886479	5719|6049|7318|7332|8452|8454|8881|55048|55741|64682|64839|65264|78991|92714|165918|200312	PSMD13|RNF6|UBA7|UBE2L3|CUL3|CUL1|CDC16|VPS37C|EDEM2|ANAPC1|FBXL17|UBE2Z|PCYOX1L|ARRDC1|RNF168|RNF215	-0.0390491	0	2	0	0	-7.39361	12.7868
-2.20964	GO:0006890	GO Biological Processes	19	retrograde vesicle-mediated transport, Golgi to endoplasmic reticulum	19_GO:0051179 localization	-2.20964	5.45571	3.84664	30211	50	443	4	0.902935	0.449424	11014|25839|55204|84084	KDELR2|COG4|GOLPH3L|RAB6C	-0.0390491	0	8	0	0	-3.55218	5.45571
-2.20964	GO:0021695	GO Biological Processes	19	cerebellar cortex development	19_GO:0032502 developmental process	-2.20964	5.45571	3.84664	30211	50	443	4	0.902935	0.449424	16|473|8704|23287	AARS1|RERE|B4GALT2|AGTPBP1	-0.0390491	0	15	0	0	-3.21278	10.1032
-2.19172	GO:0140694	GO Biological Processes	19	non-membrane-bounded organelle assembly	19_GO:0009987 cellular process	-2.19172	2.41987	3.06542	30211	310	443	11	2.48307	0.73932	71|8760|9851|10426|10982|26073|55592|64946|165186|203228|729440	ACTG1|CDS2|KIAA0753|TUBGCP3|MAPRE2|POLDIP2|GOLGA2P5|CENPH|TOGARAM2|C9orf72|CCDC61	-0.0245501	0	6	0	0	-3.98897	4.39977
-2.18939	GO:0032774	GO Biological Processes	19	RNA biosynthetic process	19_GO:0008152 metabolic process	-2.18939	2.22194	2.99738	30211	399	443	13	2.93454	0.801863	905|5558|6827|6874|6920|10025|11077|30834|51513|60313|84172|91750|171568	CCNT2|PRIM2|SUPT4H1|TAF4|TCEA3|MED16|HSF2BP|POLR1H|ETV7|GPBP1L1|POLR1B|LIN52|POLR3H	-0.0245501	0	17	0	0	-3.1509	4.75789
-2.18652	GO:0002832	GO Biological Processes	19	negative regulation of response to biotic stimulus	19_GO:0048519 negative regulation of biological process	-2.18652	3.62105	3.40524	30211	113	443	6	1.3544	0.549175	3106|4277|5495|11277|23170|59307	HLA-B|MICB|PPM1B|TREX1|TTLL12|SIGIRR	-0.0245274	0	18	0	0	-3.12143	3.91933
-2.16821	GO:0044242	GO Biological Processes	19	cellular lipid catabolic process	19_GO:0008152 metabolic process	-2.16821	2.90197	3.19124	30211	188	443	8	1.80587	0.63268	37|1373|2166|5191|23600|254552|375775|653308	ACADVL|CPS1|FAAH|PEX7|AMACR|NUDT8|PNPLA7|ASAH2B	-0.00904068	0	32	1	1	-2.16821	3.96491
-2.15159	CORUM:5450	CORUM	33	Mediator complex		-2.15159	7.57738	4.17108	30211	27	443	3	0.677201	0.389656	10001|10025|219541	MED6|MED16|MED19	0	0	24	0	0	-2.80174	7.57738
-2.15159	GO:0006515	GO Biological Processes	19	protein quality control for misfolded or incompletely synthesized proteins	19_GO:0008152 metabolic process	-2.15159	7.57738	4.17108	30211	27	443	3	0.677201	0.389656	8452|55768|64839	CUL3|NGLY1|FBXL17	0	0	13	0	0	-3.29915	7.57738
-2.14404	GO:0043043	GO Biological Processes	19	peptide biosynthetic process	19_GO:0008152 metabolic process	-2.14404	2.27955	2.97522	30211	359	443	12	2.7088	0.771301	16|1975|4528|4701|7284|8663|10985|54460|55854|57470|80222|283459	AARS1|EIF4B|MTIF2|NDUFA7|TUFM|EIF3C|GCN1|MRPS21|ZC3H15|LRRC47|TARS2|GATC	0	0	4	0	0	-4.68928	15.7376
-2.14159	R-HSA-196854	Reactome Gene Sets	6	Metabolism of vitamins and cofactors		-2.14159	2.87143	3.15674	30211	190	443	8	1.80587	0.63268	2350|4363|9672|23475|25974|51004|51293|56922	FOLR2|ABCC1|SDC3|QPRT|MMACHC|COQ6|CD320|MCCC1	0	0	20	0	0	-3.09537	15.7376
-2.13039	GO:0043632	GO Biological Processes	19	modification-dependent macromolecule catabolic process	19_GO:0008152 metabolic process	-2.13039	1.99478	2.86422	30211	547	443	16	3.61174	0.886479	5719|6049|7318|7332|8452|8454|8881|55048|55741|64682|64839|65264|78991|92714|165918|200312	PSMD13|RNF6|UBA7|UBE2L3|CUL3|CUL1|CDC16|VPS37C|EDEM2|ANAPC1|FBXL17|UBE2Z|PCYOX1L|ARRDC1|RNF168|RNF215	0	0	2	0	0	-7.39361	12.7868
-2.12422	GO:1903047	GO Biological Processes	19	mitotic cell cycle process	19_GO:0009987 cellular process	-2.12422	2.04589	2.87684	30211	500	443	15	3.386	0.859334	6905|8452|8454|8881|11277|26073|27436|55159|64682|64839|64859|64946|84722|165186|729440	TBCE|CUL3|CUL1|CDC16|TREX1|POLDIP2|EML4|RFWD3|ANAPC1|FBXL17|NABP1|CENPH|PSRC1|TOGARAM2|CCDC61	0	0	25	0	0	-2.53465	2.44352
-2.11488	R-HSA-1989781	Reactome Gene Sets	6	PPARA activates gene expression		-2.11488	3.49725	3.30155	30211	117	443	6	1.3544	0.549175	405|10001|10025|10498|11010|219541	ARNT|MED6|MED16|CARM1|GLIPR1|MED19	0	0	24	0	0	-2.80174	7.57738
-2.10706	GO:0002474	GO Biological Processes	19	antigen processing and presentation of peptide antigen via MHC class I	19_GO:0002376 immune system process	-2.10706	7.30676	4.07292	30211	28	443	3	0.677201	0.389656	3106|3107|55080	HLA-B|HLA-C|TAPBPL	0	0	11	0	0	-3.32477	18.599
-2.09747	GO:0006633	GO Biological Processes	19	fatty acid biosynthetic process	19_GO:0008152 metabolic process	-2.09747	3.46761	3.27633	30211	118	443	6	1.3544	0.549175	873|2944|2950|6296|84532|653308	CBR1|GSTM1|GSTP1|ACSM3|ACSS1|ASAH2B	0	0	22	0	0	-2.87801	7.0548
-2.09119	M5885	Canonical Pathways	11	NABA MATRISOME ASSOCIATED		-2.09119	1.81615	2.76296	30211	751	443	20	4.51467	0.98646	685|1513|1520|2219|4485|5176|6277|6997|9508|9672|9976|10507|30835|55768|84898|94031|112398|114900|160364|643866	BTC|CTSK|CTSS|FCN1|MST1|SERPINF1|S100A6|TDGF1|ADAMTS3|SDC3|CLEC2B|SEMA4D|CD209|NGLY1|PLXDC2|HTRA3|EGLN2|C1QTNF4|CLEC12A|CBLN3	0	0	28	0	0	-2.42709	3.20924
-2.08025	R-HSA-400206	Reactome Gene Sets	6	Regulation of lipid metabolism by PPARalpha		-2.08025	3.43847	3.25138	30211	119	443	6	1.3544	0.549175	405|10001|10025|10498|11010|219541	ARNT|MED6|MED16|CARM1|GLIPR1|MED19	0	0	24	0	0	-2.80174	7.57738
-2.07604	GO:0071345	GO Biological Processes	19	cellular response to cytokine stimulus	19_GO:0050896 response to stimulus	-2.07604	1.84315	2.75939	30211	703	443	19	4.28894	0.962618	71|471|920|3595|3663|4332|4656|5138|5372|6997|7099|8784|11240|11277|26060|55854|84818|163702|339122	ACTG1|ATIC|CD4|IL12RB2|IRF5|MNDA|MYOG|PDE2A|PMM1|TDGF1|TLR4|TNFRSF18|PADI2|TREX1|APPL1|ZC3H15|IL17RC|IFNLR1|RAB43	0	0	33	1	1	-2.07604	1.84315
-2.06432	GO:0043949	GO Biological Processes	19	regulation of cAMP-mediated signaling	19_GO:0023052 signaling	-2.06432	7.0548	3.97949	30211	29	443	3	0.677201	0.389656	4987|5138|23295	OPRL1|PDE2A|MGRN1	0	0	12	0	0	-3.32477	18.599
-2.06432	GO:0042759	GO Biological Processes	19	long-chain fatty acid biosynthetic process	19_GO:0008152 metabolic process	-2.06432	7.0548	3.97949	30211	29	443	3	0.677201	0.389656	2944|2950|653308	GSTM1|GSTP1|ASAH2B	0	0	22	0	0	-2.87801	7.0548
-2.06432	GO:0010447	GO Biological Processes	19	response to acidic pH	19_GO:0050896 response to stimulus	-2.06432	7.0548	3.97949	30211	29	443	3	0.677201	0.389656	1520|2828|5176	CTSS|GPR4|SERPINF1	0	0	34	1	1	-2.06432	7.0548
-2.06432	R-HSA-9694548	Reactome Gene Sets	6	Maturation of spike protein		-2.06432	7.0548	3.97949	30211	29	443	3	0.677201	0.389656	1650|6487|55741	DDOST|ST3GAL3|EDEM2	0	0	7	0	0	-3.90893	7.0548
-2.0639	R-HSA-9700206	Reactome Gene Sets	6	Signaling by ALK in cancer		-2.0639	4.95974	3.58561	30211	55	443	4	0.902935	0.449424	471|5495|8454|27436	ATIC|PPM1B|CUL1|EML4	0	0	35	1	1	-2.0639	4.95974
-2.0639	R-HSA-9725370	Reactome Gene Sets	6	Signaling by ALK fusions and activated point mutants		-2.0639	4.95974	3.58561	30211	55	443	4	0.902935	0.449424	471|5495|8454|27436	ATIC|PPM1B|CUL1|EML4	0	0	35	0	0	-2.0639	4.95974
-2.05831	GO:0009062	GO Biological Processes	19	fatty acid catabolic process	19_GO:0008152 metabolic process	-2.05831	3.96491	3.35892	30211	86	443	5	1.12867	0.501899	37|2166|5191|23600|254552	ACADVL|FAAH|PEX7|AMACR|NUDT8	0	0	32	0	0	-2.16821	3.96491
-2.03806	GO:0070925	GO Biological Processes	19	organelle assembly	19_GO:0009987 cellular process	-2.03806	1.79464	2.70664	30211	760	443	20	4.51467	0.98646	71|1952|8760|9851|10426|10982|26073|55036|55048|55592|56912|64946|85302|85478|89876|165186|203228|283232|339122|729440	ACTG1|CELSR2|CDS2|KIAA0753|TUBGCP3|MAPRE2|POLDIP2|CCDC40|VPS37C|GOLGA2P5|IFT46|CENPH|FBF1|CCDC65|CFAP91|TOGARAM2|C9orf72|TMEM80|RAB43|CCDC61	0	0	6	0	0	-3.98897	4.39977
-2.03773	GO:0001960	GO Biological Processes	19	negative regulation of cytokine-mediated signaling pathway	19_GO:0023052 signaling	-2.03773	3.91933	3.32651	30211	87	443	5	1.12867	0.501899	2950|11240|11277|23170|59307	GSTP1|PADI2|TREX1|TTLL12|SIGIRR	0	0	18	0	0	-3.12143	3.91933
-2.03643	GO:0002253	GO Biological Processes	19	activation of immune response	19_GO:0002376 immune system process	-2.03643	2.30111	2.88136	30211	326	443	11	2.48307	0.73932	720|729|2219|3119|3123|4277|4332|7099|11277|79908|153579	C4A|C6|FCN1|HLA-DQB1|HLA-DRB1|MICB|MNDA|TLR4|TREX1|BTNL8|BTNL9	0	0	36	1	1	-2.03643	2.30111
-2.02324	GO:0070979	GO Biological Processes	19	protein K11-linked ubiquitination	19_GO:0008152 metabolic process	-2.02324	6.81964	3.89038	30211	30	443	3	0.677201	0.389656	7332|8881|64682	UBE2L3|CDC16|ANAPC1	0	0	2	0	0	-7.39361	12.7868
-2.02324	GO:0032786	GO Biological Processes	19	positive regulation of DNA-templated transcription, elongation	19_GO:0048518 positive regulation of biological process	-2.02324	6.81964	3.89038	30211	30	443	3	0.677201	0.389656	905|6827|8563	CCNT2|SUPT4H1|THOC5	0	0	19	0	0	-3.1148	6.81964
-2.01745	GO:0006400	GO Biological Processes	19	tRNA modification	19_GO:0008152 metabolic process	-2.01745	3.87479	3.29459	30211	88	443	5	1.12867	0.501899	16|23587|55039|55798|131965	AARS1|ELP5|TRMT12|METTL2B|METTL6	0	0	9	0	0	-3.51801	3.87479
-2.01327	R-HSA-196849	Reactome Gene Sets	6	Metabolism of water-soluble vitamins and cofactors		-2.01327	3.32665	3.15421	30211	123	443	6	1.3544	0.549175	2350|4363|23475|25974|51293|56922	FOLR2|ABCC1|QPRT|MMACHC|CD320|MCCC1	0	0	20	0	0	-3.09537	15.7376
-2.01001	GO:0032784	GO Biological Processes	19	regulation of DNA-templated transcription, elongation	19_GO:0008152 metabolic process	-2.01001	4.78571	3.48992	30211	57	443	4	0.902935	0.449424	905|6827|8563|165918	CCNT2|SUPT4H1|THOC5|RNF168	0	0	19	0	0	-3.1148	6.81964
-2.00584	GO:0072330	GO Biological Processes	19	monocarboxylic acid biosynthetic process	19_GO:0008152 metabolic process	-2.00584	2.96506	3.04978	30211	161	443	7	1.58014	0.592498	873|2944|2950|6296|23600|84532|653308	CBR1|GSTM1|GSTP1|ACSM3|AMACR|ACSS1|ASAH2B	0	0	22	0	0	-2.87801	7.0548
Note: The candidate genes identified by TWAS were analyzed by the Metascape tool (https://metascape.org/gp/index.html#/) for functional enrichment and annotation analysis. TWAS: Transcriptome-Wide Association Study.

## Sheet: Supplmental Table5
Supplmental Table 5: Common terms identified by both TWAS and mRNA expression profiles of juvenile idiopathic arthritis (JIA).
_LogP_MyList	GO	Category	CategoryID	Description	PARENT_GO	LogP	Enrichment	Z-score	#TotalGeneInLibrary	#GeneInGO	#GeneInHitList	#GeneInGOAndHitList	%InGO	STDV %InGO	GeneID	Hits	Log(q-value)	EvidenceCutoff	GROUP_ID	FirstInGroupByEnrichment	FirstInGroupByLogP	BestLogPInGroup	BestEnrichmentInGroup
-6.12372	WP2328	WikiPathways	27	Allograft Rejection		-6.12372	7.66252	7.67881	30211	89	443	10	2.25734	0.70573	720|729|3106|3107|3112|3117|3119|3123|3127|10578	C4A|C6|HLA-B|HLA-C|HLA-DOB|HLA-DQA1|HLA-DQB1|HLA-DRB1|HLA-DRB5|GNLY	-2.73128	0	1	0	0	-7.91529	21.3114
-5.40853	WP4217	WikiPathways	27	Ebola virus pathway in host		-5.40853	5.72641	6.61349	30211	131	443	11	2.48307	0.73932	71|2060|3106|3107|3112|3117|3119|3123|3127|7099|30835	ACTG1|EPS15|HLA-B|HLA-C|HLA-DOB|HLA-DQA1|HLA-DQB1|HLA-DRB1|HLA-DRB5|TLR4|CD209	-2.2923	0	1	0	0	-7.91529	21.3114
-4.87246	hsa04514	KEGG Pathway	24	Cell adhesion molecules		-4.87246	5.03463	6.02269	30211	149	443	11	2.48307	0.73932	920|3106|3107|3112|3117|3119|3123|3127|3684|8506|9672	CD4|HLA-B|HLA-C|HLA-DOB|HLA-DQA1|HLA-DQB1|HLA-DRB1|HLA-DRB5|ITGAM|CNTNAP1|SDC3	-1.8875	0	1	0	0	-7.91529	21.3114
-4.80682	hsa04640	KEGG Pathway	24	Hematopoietic cell lineage		-4.80682	6.19967	6.32159	30211	99	443	9	2.0316	0.670287	920|921|945|3112|3117|3119|3123|3127|3684	CD4|CD5|CD33|HLA-DOB|HLA-DQA1|HLA-DQB1|HLA-DRB1|HLA-DRB5|ITGAM	-1.85808	0	1	0	0	-7.91529	21.3114
-4.16215	hsa05323	KEGG Pathway	24	Rheumatoid arthritis		-4.16215	5.86636	5.7337	30211	93	443	8	1.80587	0.63268	1513|3112|3117|3119|3123|3127|7099|90423	CTSK|HLA-DOB|HLA-DQA1|HLA-DQB1|HLA-DRB1|HLA-DRB5|TLR4|ATP6V1E2	-1.32061	0	1	0	0	-7.91529	21.3114
-3.12143	GO:0002831	GO Biological Processes	19	regulation of response to biotic stimulus	19_GO:0050896 response to stimulus	-3.12143	2.72008	3.95422	30211	351	443	14	3.16027	0.831165	2219|3106|3123|4277|4332|5495|7099|11277|23170|26060|55012|59307|163702|388325	FCN1|HLA-B|HLA-DRB1|MICB|MNDA|PPM1B|TLR4|TREX1|TTLL12|APPL1|PPP2R3C|SIGIRR|IFNLR1|SCIMP	-0.631438	0	18	1	1	-3.12143	3.91933
-2.65062	R-HSA-1280215	Reactome Gene Sets	6	Cytokine Signaling in Immune system		-2.65062	2.00297	3.31102	30211	715	443	21	4.74041	1.00963	920|3106|3107|3117|3119|3123|3127|3595|3663|3684|3687|4055|5495|5719|7318|8454|8784|9972|59307|84818|163702	CD4|HLA-B|HLA-C|HLA-DQA1|HLA-DQB1|HLA-DRB1|HLA-DRB5|IL12RB2|IRF5|ITGAM|ITGAX|LTBR|PPM1B|PSMD13|UBA7|CUL1|TNFRSF18|NUP153|SIGIRR|IL17RC|IFNLR1	-0.308254	0	1	0	0	-7.91529	21.3114
-2.5816	GO:0002694	GO Biological Processes	19	regulation of leukocyte activation	19_GO:0002376 immune system process	-2.5816	2.05999	3.27728	30211	629	443	19	4.28894	0.962618	920|921|945|3112|3117|3119|3123|3127|3684|4332|7099|10326|11277|30817|30835|51293|55012|118460|284021	CD4|CD5|CD33|HLA-DOB|HLA-DQA1|HLA-DQB1|HLA-DRB1|HLA-DRB5|ITGAM|MNDA|TLR4|SIRPB1|TREX1|ADGRE2|CD209|CD320|PPP2R3C|EXOSC6|MILR1	-0.256109	0	1	0	0	-7.91529	21.3114
-2.57316	GO:0045785	GO Biological Processes	19	positive regulation of cell adhesion	19_GO:0022610 biological adhesion	-2.57316	2.2936	3.35751	30211	446	443	15	3.386	0.859334	920|921|3112|3117|3119|3123|3127|3728|5881|6251|8784|10326|26073|30835|79625	CD4|CD5|HLA-DOB|HLA-DQA1|HLA-DQB1|HLA-DRB1|HLA-DRB5|JUP|RAC3|RSU1|TNFRSF18|SIRPB1|POLDIP2|CD209|NDNF	-0.251776	0	1	0	0	-7.91529	21.3114
-2.44888	GO:0051251	GO Biological Processes	19	positive regulation of lymphocyte activation	19_GO:0002376 immune system process	-2.44888	2.38963	3.28541	30211	371	443	13	2.93454	0.801863	920|921|3112|3117|3119|3123|3127|7099|10326|30835|51293|55012|118460	CD4|CD5|HLA-DOB|HLA-DQA1|HLA-DQB1|HLA-DRB1|HLA-DRB5|TLR4|SIRPB1|CD209|CD320|PPP2R3C|EXOSC6	-0.177746	0	1	0	0	-7.91529	21.3114
-2.39443	GO:0002696	GO Biological Processes	19	positive regulation of leukocyte activation	19_GO:0002376 immune system process	-2.39443	2.26781	3.19568	30211	421	443	14	3.16027	0.831165	920|921|3112|3117|3119|3123|3127|3684|7099|10326|30835|51293|55012|118460	CD4|CD5|HLA-DOB|HLA-DQA1|HLA-DQB1|HLA-DRB1|HLA-DRB5|ITGAM|TLR4|SIRPB1|CD209|CD320|PPP2R3C|EXOSC6	-0.148112	0	1	0	0	-7.91529	21.3114
-2.34593	GO:0030155	GO Biological Processes	19	regulation of cell adhesion	19_GO:0022610 biological adhesion	-2.34593	1.88437	3.01228	30211	760	443	21	4.74041	1.00963	71|920|921|1952|2828|3112|3117|3119|3123|3127|3728|4221|5881|6251|8784|10326|10507|23499|26073|30835|79625	ACTG1|CD4|CD5|CELSR2|GPR4|HLA-DOB|HLA-DQA1|HLA-DQB1|HLA-DRB1|HLA-DRB5|JUP|MEN1|RAC3|RSU1|TNFRSF18|SIRPB1|SEMA4D|MACF1|POLDIP2|CD209|NDNF	-0.113189	0	1	0	0	-7.91529	21.3114
-2.33224	GO:0002252	GO Biological Processes	19	immune effector process	19_GO:0002376 immune system process	-2.33224	2.23072	3.12824	30211	428	443	14	3.16027	0.831165	720|729|2219|3112|3117|3119|3123|3127|5873|7099|11277|118460|165918|284021	C4A|C6|FCN1|HLA-DOB|HLA-DQA1|HLA-DQB1|HLA-DRB1|HLA-DRB5|RAB27A|TLR4|TREX1|EXOSC6|RNF168|MILR1	-0.103512	0	1	0	0	-7.91529	21.3114
-2.26319	GO:0050867	GO Biological Processes	19	positive regulation of cell activation	19_GO:0048518 positive regulation of biological process	-2.26319	2.18979	3.05275	30211	436	443	14	3.16027	0.831165	920|921|3112|3117|3119|3123|3127|3684|7099|10326|30835|51293|55012|118460	CD4|CD5|HLA-DOB|HLA-DQA1|HLA-DQB1|HLA-DRB1|HLA-DRB5|ITGAM|TLR4|SIRPB1|CD209|CD320|PPP2R3C|EXOSC6	-0.0563861	0	1	0	0	-7.91529	21.3114
-2.22856	GO:0050870	GO Biological Processes	19	positive regulation of T cell activation	19_GO:0022610 biological adhesion	-2.22856	2.75232	3.20402	30211	223	443	9	2.0316	0.670287	920|921|3112|3117|3119|3123|3127|10326|30835	CD4|CD5|HLA-DOB|HLA-DQA1|HLA-DQB1|HLA-DRB1|HLA-DRB5|SIRPB1|CD209	-0.0432398	0	1	0	0	-7.91529	21.3114
-2.26319	GO:0050867	GO Biological Processes	19	positive regulation of cell activation	19_GO:0048518 positive regulation of biological process	-2.26319	2.18979	3.05275	30211	436	443	14	3.16027	0.831165	920|921|3112|3117|3119|3123|3127|3684|7099|10326|30835|51293|55012|118460	CD4|CD5|HLA-DOB|HLA-DQA1|HLA-DQB1|HLA-DRB1|HLA-DRB5|ITGAM|TLR4|SIRPB1|CD209|CD320|PPP2R3C|EXOSC6	-0.0563861	0	1	0	0	-7.91529	21.3114
-2.09119	M5885	Canonical Pathways	11	NABA MATRISOME ASSOCIATED		-2.09119	1.81615	2.76296	30211	751	443	20	4.51467	0.98646	685|1513|1520|2219|4485|5176|6277|6997|9508|9672|9976|10507|30835|55768|84898|94031|112398|114900|160364|643866	BTC|CTSK|CTSS|FCN1|MST1|SERPINF1|S100A6|TDGF1|ADAMTS3|SDC3|CLEC2B|SEMA4D|CD209|NGLY1|PLXDC2|HTRA3|EGLN2|C1QTNF4|CLEC12A|CBLN3	0	0	28	0	0	-2.42709	3.20924
-2.07604	GO:0071345	GO Biological Processes	19	cellular response to cytokine stimulus	19_GO:0050896 response to stimulus	-2.07604	1.84315	2.75939	30211	703	443	19	4.28894	0.962618	71|471|920|3595|3663|4332|4656|5138|5372|6997|7099|8784|11240|11277|26060|55854|84818|163702|339122	ACTG1|ATIC|CD4|IL12RB2|IRF5|MNDA|MYOG|PDE2A|PMM1|TDGF1|TLR4|TNFRSF18|PADI2|TREX1|APPL1|ZC3H15|IL17RC|IFNLR1|RAB43	0	0	33	1	1	-2.07604	1.84315
-2.03643	GO:0002253	GO Biological Processes	19	activation of immune response	19_GO:0002376 immune system process	-2.03643	2.30111	2.88136	30211	326	443	11	2.48307	0.73932	720|729|2219|3119|3123|4277|4332|7099|11277|79908|153579	C4A|C6|FCN1|HLA-DQB1|HLA-DRB1|MICB|MNDA|TLR4|TREX1|BTNL8|BTNL9	0	0	36	1	1	-2.03643	2.30111
Note: The candidate genes identified by TWAS and mRNA expression profiles were further analyzed by the Metascape tool (https://metascape.org/gp/index.html#/) for functional enrichment and annotation analysis, respectively. The common terms were finally detected by comparing the significant terms identified for TWAS and the mRNA expression profiles. TWAS: Transcriptome-Wide Association Study; JIA:…
